## The dynamic epigenetic regulation of the inactive X chromosome in healthy human B cells is dysregulated in lupus patients

Sarah Pyfrom<sup>1\*\*</sup>, Bam Paneru<sup>1\*\*</sup>, James J. Knox<sup>2</sup>, Michael P. Cancro<sup>2</sup>, Sylvia Posso<sup>3</sup>, Jane H. Buckner<sup>3</sup>, and Montserrat C. Anguera<sup>1\*</sup>

<sup>1</sup>Department of Biomedical Sciences, School of Veterinary Medicine, University of Pennsylvania, Philadelphia, PA, USA

<sup>2</sup>Department of Pathology, Perlman School of Medicine, University of Pennsylvania, Philadelphia, PA, USA

<sup>3</sup>Benaroya Research Institute at Virginia Mason, Seattle, WA, USA

\*\* authors contributed equally

Running Title: Altered X-chromosome Inactivation in B cells of SLE patients

### \*Correspondence:

Montserrat C. Anguera  
anguera@vet.upenn.edu

<sup>1</sup>Department of Biomedical Sciences, School of Veterinary Medicine  
University of Pennsylvania, Room 390EB  
3800 Spruce Street  
Philadelphia, PA 19104  
Phone: (215) 898-0567

<sup>2</sup>Department of Pathology & Laboratory Medicine, Perlman School of Medicine  
University of Pennsylvania, Philadelphia, PA 19104

<sup>3</sup>Benaroya Institute at Virginia Mason  
1201 Ninth Avenue  
Seattle, WA 98101

**Keywords:** XIST RNA, X-Chromosome Inactivation, SLE, human B cells, female-biased autoimmunity, X-linked gene expression, XCI escape, H3K27me3, macroH2A, H2A-K119Ub.

1 **ABSTRACT**

2

3 Systemic lupus erythematosus (SLE) is a female-predominant disease characterized by  
4 autoimmune B cells and pathogenic autoantibody production. Individuals with two or  
5 more X chromosomes are at increased risk for SLE, suggesting that X-linked genes  
6 contribute to the observed sex-bias of this disease. To normalize X-linked gene  
7 expression between sexes, one X in female cells is randomly selected for transcriptional  
8 silencing through X-Chromosome Inactivation (XCI), resulting in allele-specific  
9 enrichment of epigenetic modifications, including histone methylation and the long  
10 noncoding RNA XIST/Xist on the inactive X (Xi). As we have previously shown that  
11 epigenetic regulation of the Xi in female lymphocytes from mice is unexpectedly  
12 dynamic, we used RNA FISH and immunofluorescence to profile epigenetic features of  
13 the Xi at the single cell level in human B cell subsets from pediatric and adult SLE  
14 patients and healthy controls. Our data reveal that abnormal XCI maintenance in B cells  
15 is a feature of SLE. Using single-cell and bulk cell RNA sequencing datasets, we found  
16 that novel X-linked immunity genes escape XCI in specific healthy human B cell  
17 subsets, and that human SLE B cells exhibit aberrant expression of X-linked genes and  
18 XIST RNA Interactome genes. Our data reveal that mislocalized XIST RNA, coupled  
19 with a dramatic reduction in heterochromatic modifications at the Xi in SLE, predispose  
20 for aberrant X-linked gene expression from the Xi, thus defining a novel genetic and  
21 epigenetic pathway that affects X-linked gene expression in human SLE B cells and  
22 likely contributes to the female-bias in SLE.

## 23 INTRODUCTION

24

25 Systemic lupus erythematosus (SLE) is an incurable autoimmune disease with  
26 multiorgan system manifestations. B cells contribute to various aspects of SLE by  
27 secreting pathogenic autoantibodies, presenting autoantigens to T cells, and producing  
28 inflammatory cytokines. In addition, the representation of B cell subsets changes in  
29 SLE, which can accelerate the production of autoantibodies. In particular, CD27<sup>-</sup>  
30 memory B cells<sup>1</sup>, CD19<sup>hi</sup>CXCR3<sup>hi</sup> B cells<sup>2</sup>, CD24<sup>-</sup>-activated naïve B cells<sup>3</sup>, and age-  
31 associated CD11c<sup>+</sup> B cells that express T-bet<sup>4,5</sup> are increased in autoimmunity. Thus, a  
32 further understanding of the mechanisms involved in autoimmune B cell dysregulation is  
33 critical for future efforts to control the development and progression of SLE.

34

35 Like many autoimmune diseases, SLE exhibits a strong female bias, with 85% of  
36 patients being women. The underlying mechanisms responsible for this sex difference  
37 are not well understood, yet it is clear that the genetics of the X chromosome impacts  
38 disease susceptibility<sup>6</sup>. Indeed, individuals with two or more X chromosomes are at  
39 increased risk for SLE<sup>7</sup>, suggesting that X-linked genes have a significant role in  
40 disease. Immunity-related genes are enriched on the X chromosome<sup>8,9</sup>, and some of  
41 these genes are routinely overexpressed in SLE patient B cells<sup>10-13</sup>. In addition, mouse  
42 models with X-linked gene duplication (such as the BXSB-Yaa mouse model<sup>14,15</sup>) or  
43 transgenic overexpression of either of the X-linked genes *Tlr7*<sup>16,17</sup> or *Btk*<sup>18,19</sup> exhibit  
44 disease resembling human SLE, with production of dsDNA autoantibodies. Thus,

45 abnormal dosage or expression of particular X-linked genes is associated with SLE  
46 disease in mice and humans.

47

48 Female mammalian cells with two X chromosomes regulate X-linked gene expression  
49 using X-chromosome Inactivation (XCI), in which one X is randomly selected for  
50 transcriptional silencing to equalize gene expression between the sexes<sup>20,21</sup>. Numerous  
51 epigenetic modifications, including histone methylation<sup>22,23</sup>, DNA methylation<sup>24,25</sup>, and  
52 the long noncoding RNA XIST/Xist<sup>26-28</sup> are enriched allele-specifically on the inactive X  
53 (Xi), and maintain transcriptional repression of most of the X-chromosome. However,  
54 some X-linked genes escape XCI, and human cells exhibit higher levels of XCI escape  
55 (15-25% of the X chromosome) compared to mice (3% escape)<sup>29,30</sup>. While most  
56 somatic cells maintain XCI with static enrichment of Xist RNA and heterochromatin  
57 marks on the Xi, we found that lymphocytes exhibit a unique dynamic localization of  
58 these modifications to the Xi following stimulation<sup>31-33</sup>. These observations are likely to  
59 be significant to pathogenesis, as we recently showed that T cells from SLE patients  
60 have dispersed XIST RNA transcripts and aberrant overexpression of many X-linked  
61 gene transcripts compared to T cells from healthy controls<sup>32</sup>.

62

63 In this study, we determined the epigenetic profile of the Xi in human B cell subsets at  
64 the single-cell level, and found that typical heterochromatic modifications are missing  
65 from the Xi, suggestive of high levels of XCI escape across B cells. Remarkably, we  
66 found mislocalized XIST RNA and reductions with the heterochromatin mark  
67 H2AK119Ub at the Xi in activated B cells from pediatric and adult SLE patients, and

68 accordingly, discovered aberrant gene expression profiles of X-linked genes in activated  
69 SLE B cells. Our study demonstrates that the unique chromatin features of the Xi in  
70 human B cells facilitates XCI escape, and we propose that impaired XCI maintenance in  
71 SLE results in aberrant gene expression of X-linked genes, that may further contribute  
72 to autoimmunity.

73

74

75

## 76 **RESULTS**

77

### 78 **Circulating human B cell subsets lack robust XIST RNA localization at the Xi**

79

80 We previously reported that naïve B cells from female humans lack detectible XIST  
81 RNA signals at the Xi, and that naïve B cells from female mice are missing both Xist  
82 RNA and enrichment of the heterochromatin modification H3K27me3 at the Xi. XIST  
83 RNA localization patterns in lymphocytes can be classified into 4 groups<sup>31,32</sup>. Type I  
84 cells have robust XIST RNA localized on the Xi; Type II cells have diffuse XIST RNA  
85 signals within a nuclear territory encompassing the X chromosome; Type III cells have  
86 XIST RNA pinpoints across the nucleus; and Type IV cells lack XIST RNA signals (Fig.  
87 1A). To determine whether XIST RNA and the heterochromatin modification H2AK119-  
88 ubiquitin (H2AK119Ub) were missing from the Xi in human B cell subsets, we isolated  
89 circulating naïve B (CD19<sup>+</sup>CD10<sup>-</sup>CD21<sup>+</sup>IgD<sup>+</sup>), memory B (CD19<sup>+</sup> CD27<sup>+</sup>), plasma  
90 (CD19<sup>+</sup> CD138<sup>+</sup>), and age-associated B cells (ABCs; CD19<sup>+</sup>CD11c<sup>+</sup>) from healthy  
91 human donors for sequential XIST RNA FISH and immunofluorescence (IF).  
92 Remarkably, we found that both XIST RNA transcripts and H2AK119Ub foci were  
93 missing from the Xi in naïve B cells, plasma cells, and ABCs (Fig. 1B). Memory B cells  
94 had dispersed XIST RNA signals across the nucleus, yet also lacked H2AK119Ub foci  
95 (Fig. 1A). We quantified the XIST RNA localization patterns for human B cell subsets  
96 and found that naïve B, ABCs, and plasma B cells are predominantly Type IV, and  
97 memory B cells were mostly Type III with some Type II patterns (one-way ANOVA for  
98 Type II, Type III, Type IV  $p < 0.05$ ; Fig. 1C). All four B cell subsets examined lacked

99 detectable H2AK119Ub foci (Fig. 1D), including memory B cells that displayed Type III  
100 XIST RNA pinpoints across the nucleus. As a previously published RNAseq dataset<sup>34</sup>  
101 revealed that *XIST* is continuously expressed in naïve, memory, and ABC cells (Fig.  
102 1E), our findings indicate that XIST RNA localization and transcription of the *XIST* gene  
103 are genetically uncoupled in human B cell subsets.

104

105 **XIST RNA and heterochromatin modifications H2AK119Ub and H3K27me3 are**  
106 **localized at the Xi after *in vitro* activation of mature naïve human B cells**

107

108 While naïve B cells from female mice lack Xist RNA and heterochromatin mark  
109 enrichment on the Xi, we have shown that these epigenetic modifications return to the  
110 Xi at 24-30 hrs post stimulation<sup>35</sup>. Here, we determined if the dynamic localization of  
111 XIST RNA is similarly observed in healthy naïve and memory B cells stimulated *in vitro*  
112 using CpG for 3 -7 days. Using RNA FISH, we find that XIST RNA transcripts were first  
113 detected in naïve B cells at 1-2 days post-stimulation, and signals decreased by 3-4  
114 days post-stimulation (Fig. 2A). The efficiency of *in vitro* stimulation was assessed by  
115 CD86+ staining, with ~50-60% of B cells being positive for this marker in each XIST  
116 RNA experiment (Fig. 2B). We quantified the XIST RNA localization patterns during  
117 human B cell activation and found that day 2 stimulated B cells had the highest levels of  
118 Type I and Type II XIST RNA localization patterns (Fig. 2C), with such patterns  
119 appearing at day 1 post-stimulation. Type III XIST RNA localization patterns were  
120 predominant at days 3-7 post *in vitro* activation (Fig. 2C). XIST RNA transcript levels  
121 were relatively similar between naïve and *in vitro* stimulated B cells (Supplemental

122 Figure 1), as previously observed in mouse B cells<sup>35</sup> and reflecting uncoupled XIST  
123 transcription and localization to the Xi. Similar analysis of circulating memory B cells  
124 revealed that Type I and II XIST RNA patterns predominated after 3 days of culture  
125 post-stimulation for memory B cells (Fig. 2D, 2E). In sum, *in vitro* activation using CpG  
126 stimulates the return of XIST RNA transcripts to the Xi in both naïve and memory B  
127 cells.

128

129 We next asked whether XIST RNA recruitment to the Xi coincided with the enrichment  
130 of heterochromatic foci typical of the Xi in somatic cells<sup>22</sup>. Circulating naïve B cells were  
131 activated with CpG for 2 days, and then used for sequential XIST RNA FISH followed by  
132 IF using antibodies for H3K27me3 and H2AK119Ub. We quantified the number of nuclei  
133 that exhibited co-localization of XIST RNA with a heterochromatic focus (Fig. 3). The  
134 majority of activated B cells (40-80%) contained a focus that co-localized with Type I  
135 XIST RNA patterns and either H2AK119Ub (Fig. 3A) or H3K27me3 (Fig. 3B). There  
136 were very few nuclei with XIST Type IV patterns (purple bars), and a focus with either  
137 H2AK119Ub or H3K27me3 (2-4%), suggesting that XIST RNA localization to the Xi may  
138 be necessary for enrichment of these repressive modifications. Return of epigenetic  
139 marks to the Xi during human B cell activation occurs in one phase in which both XIST  
140 RNA and heterochromatin modifications appear concurrently at the Xi beginning at day  
141 1 post-stimulation using CpG, with peak enrichment occurring at day 2.

142

143 Next, we asked whether the histone variant macroH2A, which is also typically enriched  
144 on the Xi in fibroblasts, was localized to the Xi of *in vitro* activated healthy human B



145 cells. We observed very few macroH2A1 foci in these cells, with approximately 10% co-  
146 localization of XIST RNA with a focus of macroH2A1 (Supplemental Figure 2A, 2B).  
147 Use of qRT-PCR revealed expression of both transcript variants, but these levels still  
148 remained below those observed in human female fibroblasts (Supplemental Figure 2C).  
149 We also investigated whether the active chromatin modification H3K4me3 was depleted  
150 within the territory of the Xi in activated B cells, as typically observed in female  
151 fibroblasts<sup>36,37</sup>. Using sequential XIST RNA FISH followed by IF, we observed the  
152 characteristic H3K4me3 'holes', reflecting active transcription, which overlapped with  
153 XIST RNA Type I and II signals in 70-85% of the nuclei (Supplemental Fig. 3). In sum,  
154 the chromatin of the Xi in CpG activated human B cells is enriched for some, but not all,  
155 silent and active chromatin modifications, underscoring important differences with other  
156 somatic cells.

157

### 158 **Single-cell transcriptional profiling of human B cell subsets reveals cell-type** 159 **specific biallelic expression of X-linked genes**

160

161 The absence of XIST RNA and heterochromatic modifications H2AK119Ub, H3K27me3,  
162 and macroH2A from the Xi in circulating B cell subsets suggests that there may be  
163 either increased overall transcription from this chromosome or that the number of genes  
164 that escape from XCI would be increased. To investigate this possibility, we queried  
165 single-cell RNA sequencing (scRNAseq) data from a recent study<sup>38</sup> examining 117  
166 human B cells isolated from a healthy female donor. These cells were sorted by surface  
167 markers and consist of 30 memory B cells, 30 naïve B cells, 30 plasmablasts, and 27

168 transitional B cells. We determined the X-linked SNP expression for genes in each cell  
169 using a SNP detection threshold of at least 10 reads/SNP (Fig. 4A). Each X-linked gene  
170 containing a SNP was called 'monoallelic' if greater than 90% of the reads had the  
171 same SNP, otherwise the gene was called 'biallelic'. We detected 6816 individual X-  
172 linked SNPs, and 391 unique X-linked genes that were expressed across the B cell  
173 subsets (Fig. 4A; Supplemental Tables 1, 2). We observed novel cell-type specific XCI  
174 escape with higher levels of biallelic expression in memory B cells (98 biallelic genes)  
175 and plasmablasts (122 biallelic genes) compared to transitional B and naïve B cells  
176 (light blue, Fig. 4B; Supplemental Table 3). We detected a total of 190 X-linked genes  
177 that escape XCI across all B cell subsets and 77% of these genes were novel XCI  
178 escape genes, as they had not been reported previously (Supplemental Table 3). We  
179 also observed expression of 53 X-linked immunity-related genes across the B cell  
180 subsets, and found that 38 of these genes (72%) were biallelically expressed (light blue,  
181 Fig. 4C; Supplemental Table 4). We summarized the expression status for the X-linked  
182 immunity-related genes across the four human B cell subsets in Figure 4D. Biallelic  
183 expression (light blue) of *DDX3X* in all four B cell subsets was expected, as *DDX3X*  
184 ubiquitously escapes XCI in multiple tissues<sup>30</sup>. While *NONO*, *AP1S2*, *TSC22D3*,  
185 *AP1S2*, *IL2RG*, *SASH3*, *MSN*, and *CYBB* also escaped XCI across all 4 B cell subsets,  
186 the significance of this biallelic expression is unknown as overexpression of these  
187 genes has not been reported in autoimmune diseases. As expected, *XIST* was  
188 exclusively monoallelic (dark blue) across all B cells (Fig.4D), given its selective  
189 expression from the Xi. We also detected variable XCI escape of *TLR7* in naïve B cells  
190 and plasmablasts, which has been observed previously by our group and others<sup>31,39</sup>.

191 Interestingly, we also observed variable XCI escape for *BTK*, which is notable because  
192 dosage imbalances of this gene are associated with lupus-like phenotypes<sup>18,19</sup>. In sum,  
193 human B cells exhibit cell-type specific XCI escape of important immune regulatory  
194 genes that could potentially contribute to sex-dependent differences in cellular function,  
195 thereby impacting autoimmune disease.

196

197 **Pediatric SLE patient B cells have missing or mislocalized XIST RNA transcripts**  
198 **from the Xi and lack H2AK119Ub foci**

199

200 Cell lines derived from SLE patient B cells exhibited differences in XIST RNA  
201 localization patterns compared to cell lines from age-matched, healthy individuals<sup>31</sup>.  
202 Here, we investigated whether primary naïve B cells from SLE patients would also have  
203 mislocalized XIST RNA patterns. Naïve B cells isolated from pediatric SLE patients in  
204 disease remission (SLE disease activity index [SLEDAI] score 0-1) were stimulated *in*  
205 *vitro* using CpG for 2 days, and then used for XIST RNA FISH analyses. We quantified  
206 the percentage of each type of XIST RNA localization pattern for both circulating naïve  
207 B cells and activated B cells that had been stimulated *in vitro* (Supplemental Figure 4).  
208 There were no significant differences between XIST RNA localization patterns for  
209 circulating naïve B cells from pediatric SLE patients and age-matched healthy controls  
210 (Supplemental Figure 4A). In contrast, we found that there were very few examples of  
211 Type I and significantly reduced levels of Type II XIST RNA patterns for pediatric SLE *in*  
212 *vitro* stimulated B cells compared to healthy controls (Fig. 5A, 5B, Supplemental Figure  
213 4B;  $p < 0.0001$ , and  $p = 0.0002$ ). *In vitro* activated SLE patient B cells also had

214 significantly higher levels of Type IV XIST RNA patterns, where nuclei lack detectable  
215 XIST signals (Fig. 5B, Supplemental Figure 4B;  $p = 0.008$ ). Aberrant XIST RNA  
216 localization patterns in activated pediatric SLE B cells were not a result of impaired or  
217 ineffective stimulation using CpG (a TLR9 agonist), as SLE B cells had similar levels of  
218 the activation marker CD86 (Supplemental Figure 4C). XIST RNA localization patterns  
219 were also disrupted in SLE patient memory B cells compared to healthy controls, with  
220 predominantly Type III and Type IV patterns (Supplemental Figure 4D;  $p = 0.004$ ). To  
221 further assess if enrichment of the heterochromatic modification H2AK119Ub was also  
222 affected, we performed IF for H2AK119Ub on circulating and *in vitro* activated B cells  
223 from pediatric SLE patients and healthy controls. We observed a significant reduction in  
224 H2K119Ub foci in the activated B cells from pediatric SLE patient samples relative to  
225 healthy controls (Fig. 5C;  $p = 8.9E-6$ ). Circulating naïve B cells from both SLE patients  
226 and healthy controls lacked detectible H2AK119Ub foci, as expected (Fig. 1). In sum,  
227 mislocalization of XIST RNA and near-absence of H2AK119Ub foci on the Xi is a  
228 feature of activated pediatric SLE patient B cells in disease remission.

229

230 **B cells from adult SLE patients have aberrant XIST RNA localization patterns and**  
231 **significant reductions in H2AK119Ub enrichment on Xi, irrespective of disease**  
232 **activity**

233

234 We initially confirmed that that CD27- isolated cells from SLE patients had relatively  
235 similar representation of all B cell populations relative to healthy controls (Supplemental  
236 Figure S5). Similar to *in vitro* activated pediatric SLE patient B cells, *in vitro* activated B

237 cells from adult SLE patients had significantly fewer Type I ( $p < 0.0001$ ) and Type II ( $p <$   
238  $0.0001$ ) XIST RNA patterns, and significantly more Type IV patterns ( $p < 0.0001$ ),  
239 signifying abnormal XIST RNA localization patterns in B cells from adult SLE patients  
240 (Figures 6A, 6B; Supplemental Figure 6). In contrast to the pediatric SLE population,  
241 about half of the adult SLE patients had similar levels of Type I and Type IV XIST RNA  
242 patterns as healthy controls (Fig. 6B). Co-localization of XIST RNA with H2AK119Ub  
243 foci were significantly reduced in adult SLE patient B cells compared to healthy controls  
244 (blue bars,  $p < 0.0001$ ; Fig. 6C), and cells containing an H2AK119Ub focus independent  
245 of XIST RNA signals (Types I, II) were absent in SLE samples (orange bars). Activation  
246 of naïve B cells following stimulation with CpG (as determined by CD86<sup>+</sup> levels) was not  
247 significantly affected in adult SLE samples (Supplemental Figure 6B). In sum,  
248 enrichment of both XIST RNA and the heterochromatic modification H2AK119Ub at the  
249 Xi are significantly reduced for *in vitro* activated adult SLE B cells.

250

251 We next asked whether the distribution of XIST RNA patterns correlated with SLE  
252 disease activity (SLEDAI values), patient medications, age, or disease duration. For  
253 these analyses, we removed patients with known comorbidities, including thyroid  
254 illnesses (such as Grave's disease) as they exhibit greater Type III and fewer Type IV  
255 XIST RNA patterns (Supplemental Figure S7; left panels). Analysis of each XIST RNA  
256 localization pattern and the 6 medications typically used to treat SLE symptoms  
257 demonstrated that only hydroxychloroquine showed significant correlation with Type I  
258 XIST RNA localization patterns, comparable to healthy controls (Supplemental Fig.  
259 7A,7E). We then performed multiple linear regressions between continuous patient

260 metrics (age at sample draw, SLEDAI score, anti-nuclear antibody titer, and disease  
261 duration) and the percentage of Type I-IV XIST RNA localization patterns  
262 (Supplemental Figure S8). Of all supplied metrics, SLE patient age was the only one  
263 that correlated positively with the Type IV XIST RNA patterns ( $p$ -value: 0.030,  $R^2$ : 0.214;  
264 Supplemental Fig. S8B). Healthy control samples did not exhibit a similar correlation  
265 (Supplemental Fig. S8B). Taken together, activated B cells from adult SLE patients  
266 exhibit aberrant XIST RNA localization and reduced H2AK119Ub enrichment on the Xi,  
267 irrespective of disease activity but correlated with patient age, suggestive of  
268 impairments with gene expression on this chromosome.

269

### 270 **Activated B cells from SLE patients exhibit abnormal expression of X-linked** 271 **genes and XIST RNA Interactome genes**

272

273 Because SLE activated B cells from both pediatric and adult SLE patients exhibited  
274 abnormal XIST RNA localization and reduced/missing H2AK119Ub enrichment at the  
275 Xi, we asked whether these changes were also associated with abnormal X-linked gene  
276 expression. To answer this, we utilized a previously published RNA sequencing dataset  
277 (GSE118254) that profiled activated B cells in circulation (CD19+IgD+CD27-  
278 MTG+CD24-CD38-) in seven female SLE patients and six healthy controls<sup>40</sup>. In this  
279 dataset, we found that 53 X-linked genes were differentially expressed in activated B  
280 cells from SLE patients, and 18 of these genes were overexpressed (Figure 7A). Among  
281 the 53 differentially expressed X-linked genes, 4 have known immune functions (genes  
282 in orange), and these genes exhibited XCI escape in at least 1 B cell subset (Fig. 4D,

283 Supplemental Table S3). Comparison of the 53 X-linked genes altered in SLE with our  
284 results from Supplemental Table 3 and published lists of XCI escape genes from  
285 various cell types<sup>30</sup> indicate that the majority of the genes in Fig. 7A (all the genes in  
286 color) may escape XCI in activated B cells. Notably, 18 X-linked genes were  
287 significantly upregulated in SLE patient activated B cell samples (red genes), and few of  
288 the downregulated genes (blue genes) passed the significance threshold (Fig. 7B).  
289 Unexpectedly, we found that the majority of these putative XCI escape genes are  
290 downregulated in SLE B cells (Fig. 7A), suggesting impairments with the regulation of  
291 XCI escape on the Xi in SLE. In sum, we identified a novel set of X-linked genes whose  
292 expression is altered in SLE patient activated B cells, and the majority of these genes  
293 should be subject to XCI silencing, reflecting aberrant gene regulation on both Xs.

294 One possible mechanism for aberrant XIST RNA localization in SLE patient activated B  
295 cells could result from impairments with nuclear proteins that bind XIST RNA. The XIST  
296 RNA Interactome consists of ~275 proteins<sup>41-44</sup>, and we have previously reported that  
297 two XIST RNA binding proteins, YY1 and hnRNP-U, are required for localization of XIST  
298 RNA and heterochromatin marks to the Xi in lymphocytes<sup>31,35</sup>. Notably, SLE patient T  
299 cells have altered expression of XIST RNA Interactome genes<sup>32</sup>. Thus, we asked  
300 whether the expression of genes encoding XIST RNA binding proteins was also  
301 abnormal in the activated B cells from SLE patients. We found that 80 XIST RNA  
302 binding protein genes were differentially expressed in activated B cells, and the majority  
303 of these genes (59/80; 74%) were downregulated (Fig. 7C, Supplemental Table 5).  
304 These genes function in cell metabolism/cell growth (genes in green), nuclear  
305 matrix/nuclear envelope/transport (blue, but also includes *LBR* and *hnRNPK*), and

306 chromatin regulation (orange) (Fig. 7C). Downregulated genes *LBR*, *hnRNP K*, and  
307 *GLIPR2* (pink) also exhibited altered gene expression among SLE T cells relative to  
308 healthy controls<sup>32</sup>. Taken together, the XIST RNA Interactome is dysregulated in  
309 activated B cells from SLE patients, and may be responsible for mislocalization of XIST  
310 RNA and heterochromatin modifications from the Xi, resulting in aberrant XCI  
311 maintenance.

312

313

314



## 315 **DISCUSSION**

316

317 B cells contribute to the pathogenesis of SLE, an autoimmune disease that  
318 predominantly affects women. Here we sought to investigate the genetic basis for the  
319 female-bias of SLE, focusing first on how XCI is maintained across distinct B cell  
320 subsets in healthy individuals, and then determining if XCI maintenance and X-linked  
321 genes expression are affected in SLE. We discovered a diverse enrichment of  
322 epigenetic modifications at the Xi across activated human B cell subsets, and found B  
323 cell-specific patterns of XCI escape in healthy adults, including the escape of important  
324 immune-related genes. Our profiling of pediatric and adult SLE patient B cells revealed  
325 significant impairments with XIST RNA and H2AK119Ub enrichment on the Xi  
326 irrespective of disease activity, and aberrant expression of X-linked genes. Together,  
327 our results suggest that facultative chromatin of the Xi is relaxed in healthy B cells,  
328 thereby altering XCI maintenance and permitting gene-specific escape from XCI. SLE  
329 disease further impacts the heterochromatic composition of this chromosome, resulting  
330 in abnormal gene expression changes across the X. Our epigenetic profiling of the Xi in  
331 healthy and SLE B cells provides a foundation for future studies investigating the  
332 molecular mechanisms of XIST RNA and heterochromatin mark localization and  
333 spreading across the Xi, and how these mechanisms become altered in SLE.

334

335 All four human B cell subsets assessed – naïve B, classical memory B, plasma cells,  
336 and ABCs – are missing XIST RNA and the heterochromatic modification H2AK119Ub  
337 on the Xi (Figure 1). Unexpectedly, our analyses show that unlike naïve B cells, ABCs,

338 and plasma cells, memory B cells have XIST RNA transcripts dispersed across the  
339 nucleus, yet still lack H2AK119Ub foci on the Xi (Figure 1C, 1D). At present, the  
340 significance of dispersed XIST RNA transcripts in memory B cells is unknown. However,  
341 it is likely to impact gene expression on the Xi as *ex vivo* *YY1* deletion generates similar  
342 Type III dispersed patterns with altered expression of ~70 X-linked genes<sup>35</sup>. The *XIST*  
343 gene is expressed across all resting human B cell subsets (Figure 1E), thus  
344 transcriptional changes do not account for the absence of XIST RNA transcripts on the  
345 Xi in circulating human B cells. XIST RNA and the heterochromatin modifications  
346 H2AK119Ub, H3K27me3, and low levels of macroH2A returned to the Xi when using  
347 CpG to activate human naïve B cells (Figure 2, 3, Supplemental S2). As for mouse  
348 naïve B cells, XIST RNA and heterochromatin marks return to the Xi in human naïve B  
349 cells before the first cell division<sup>35</sup>, with peak enrichment at day 2 post-stimulation and  
350 prior to cell division<sup>45</sup>. We propose the Xi chromatin in circulating human B cell subsets  
351 is more relaxed compared to somatic cells, in which XIST RNA and heterochromatin  
352 marks are localized to the Xi, and this may allow additional X-linked genes to escape  
353 transcriptional silencing. However, as our cytogenetic RNA FISH and IF analyses lack  
354 resolution at the gene-level, it will be important to determine allele-specific enrichment  
355 of silent and active histone modifications at genes exhibiting cell-specific XCI escape  
356 and silencing across B cell subsets, and to further assess if such modifications are  
357 altered upon activation.

358

359 Single-cell RNAseq profiling of four human B cell subsets from a healthy female  
360 individual reveals cell-type specific XCI escape in naïve B cells, memory B cells,

361 plasmablasts, and transitional B cells. The percentage of biallelically expressed X-linked  
362 genes increase with B cell differentiation (Supplemental Table 3), which may reflect a  
363 requirement for higher dosage of X-linked genes for proper function of memory B cells  
364 and plasmablasts. For example, *LAMP2*, a lysosomal protein important for autophagy  
365 and intracellular antigen presentation, is monoallelically expressed in transitional and  
366 naïve B cells, yet biallelically expressed in memory B and plasmablasts (Fig. 4D). Such  
367 results raise the intriguing possibility that biallelic expression of *LAMP2* may increase  
368 autophagy and antigen presentation, thereby contributing to enhanced immune  
369 responses observed in females<sup>46</sup>. The X-linked gene *IRAK1*, responsible for IL1-  
370 induced upregulation of NF-kappa B, is also biallelically expressed in memory B cells  
371 and plasmablasts (Fig. 4D). Female neonates have higher levels of *IRAK1* mRNA and  
372 protein in cord blood and mononucleated cells compared to males<sup>47</sup>, potentially  
373 contributing to reduced infection rates and female-specific immune advantages in  
374 infants. However, these scRNAseq analyses are limited by the fact that the sample was  
375 taken from one individual and does not contain *in vivo* stimulated B cells, which may  
376 have distinct XCI escape profiles. As XCI escape exhibits individual variability when  
377 comparing across human samples<sup>48</sup>, it will be important to repeat the allelic expression  
378 profiling for human B cell subsets, especially activated B cells, using healthy female  
379 individuals of different ages to determine which X-linked genes consistently escape  
380 transcriptional silencing, and whether XCI escape increases with age.

381

382 Our investigations revealed abnormal XCI maintenance, as evidenced by reduced XIST  
383 RNA and H2AK119Ub enrichment at the Xi, in both pediatric and adult SLE patient B

384 cells, irrespective of disease activity. Perturbed XIST RNA and heterochromatin mark  
385 localization to the Xi in lymphocytes is a feature of both human SLE and the analogous  
386 lupus-like disease in the female-biased spontaneous mouse model NZB/W F1<sup>32,49</sup>.  
387 Activated SLE patient B cells exhibit altered expression of about 50 X-linked genes (Fig.  
388 7A), and the majority of these genes were downregulated in SLE patients compared to  
389 healthy controls. It is surprising that more than half of the downregulated X-linked genes  
390 in SLE samples are putative XCI escape genes (Fig. 4 and previous studies in human  
391 fibroblasts). The implications of reduced expression of these X-linked genes for B cell  
392 function is unknown at this time. It is possible that aberrant XIST RNA localization and  
393 reduced heterochromatic enrichment reflects alterations in the nuclear organization of  
394 the Xi in SLE patient B cells. The Xi, unlike the active X and autosomes, is organized  
395 into two “megadomains” separated by a boundary region near the microsatellite repeat  
396 *Dxz4*<sup>50,51</sup>. During XCI initiation, *Xist* RNA plays an important structural role for  
397 configuring the Xi territory, and *Xist* deletion impairs megadomain formation<sup>52</sup>. XIST  
398 RNA mislocalization in SLE patient B cells may reflect impairments to the Xi nuclear  
399 territory, possibly resulting in abnormal gene silencing of some X-linked genes.

400

401 While altered X-linked gene expression can clearly impact SLE progression, our studies  
402 cannot determine if abnormal XCI maintenance causes SLE disease, or is instead a  
403 consequence of the disease. To date, there is no evidence that changes to the  
404 extracellular environment can influence XCI maintenance in somatic cells. However, the  
405 nuclear pore complex *NUP43* and lamin B receptor (*LBR*), which are *Xist* RNA binding  
406 proteins, were downregulated in SLE patient B cells (Fig. 7C). This may contribute to

407 aberrant organization of the Xi nuclear territory in SLE patient B cells, as LBR protein  
408 directly binds Xist RNA and this interaction is necessary for tethering the Xi to the  
409 nuclear lamina and gene silencing<sup>53</sup>. While it is currently unclear if the inflammatory  
410 environment of SLE affects nuclear architecture, it is tempting to speculate that  
411 inflammatory cytokines or type I interferons, which are highly elevated in SLE patients  
412 experiencing disease flares, may perturb XCI maintenance in B cells, resulting in altered  
413 X-linked gene expression. Future studies to determine whether extrinsic factors can  
414 influence XCI maintenance in lymphocytes will certainly reveal exciting new insights into  
415 genetic and epigenetic factors responsible for sex-biased autoimmune disease.  
416

417 **METHODS**

418

419

420 *Human B cell samples from healthy donors and SLE patients*

421

422 Fresh and frozen PBMCs from adult healthy female donors were obtained from the  
423 Penn Pathology BioResource core facility at the Perelman School of Medicine,  
424 University of Pennsylvania. For comparative study of pediatric SLE patients (SLEDAI  
425 score = 0) and age-matched healthy controls, we recruited patients from the Children's  
426 Hospital of Philadelphia (CHOP). Approximately 15-20 mL of blood were collected from  
427 each individual, stored on ice, then immediately processed for PBMC isolation. PBMCs  
428 were separated from whole blood by density gradient centrifugation technique using  
429 Lymphoprep media (cat # 07851, STEMCELL technologies, Cambridge, MA, USA).  
430 PBMCs from CHOP patients were either frozen or used to isolate B cells immediately,  
431 and we did not observe any effect of freeze/thaw on XIST RNA localization patterns.  
432 PBMCs were frozen in fetal bovine serum containing 7%-10% DMSO. We also obtained  
433 frozen PBMC samples from adult SLE patients (SLEDAI score: 0-20; age 18-63 yrs.)  
434 and age-matched healthy controls from the Benaroya Research Institute, Seattle,  
435 Washington. The acquisition of blood samples from pediatric SLE patients and healthy  
436 controls from CHOP was approved by the IRB at CHOP; acquisition of blood from adult  
437 SLE patients and healthy controls from the Benaroya Institute was approved by the IRB  
438 at the Benaroya Institute. Written informed consent was received from participants prior  
439 to inclusion in both studies.

440

441 *Sorting and culture of human B cells*

442

443 Frozen PBMCs were quickly thawed and washed twice with RPMI media containing  
444 FBS. CD19<sup>+</sup>CD27<sup>-</sup> naïve B cells and CD19<sup>+</sup>CD27<sup>+</sup> memory B cells were isolated from  
445 PBMCs using the Easysep human memory B cell isolation kit, according to the  
446 manufacture's instruction (17864, STEMCELL Technologies, Cambridge, MA, USA).  
447 CD19<sup>+</sup>CD138<sup>+</sup> plasma cells were isolated from PBMCs by positive selection using biotin  
448 conjugated CD138 antibody (352322, Biolegend, San Diego, CA, USA) and Easysep

449 release human biotin positive selection cocktail (17653, STEMCELL Technologies).  
450 CD19<sup>+</sup>CD11c<sup>+</sup> B cells (ABCs) were isolated from PBMCs using a two-step procedure.  
451 First, total B cells were isolated from PBMCs by negative selection using the human B  
452 Cell Isolation Kit II (130-091-151, Miltenyi Biotec, Cambridge, MA, USA). ABCs were  
453 isolated from purified total B cells by CD11c positive selection using a biotin conjugated  
454 CD11c antibody (301612, Biolegend) and anti-biotin magnetic beads. B cells were  
455 cultured in X-VIVO<sup>TM</sup>15 media (04-744Q, Lonza, Walkersville, MD, USA) with penicillin-  
456 streptomycin (100 units/mL) and activated using 3 μM CpG (ODN 7909) (tlrl-2006-1,  
457 Invivogen, San Diego, CA, USA). Cells were cultured in 200 μl medium for 1-8 days  
458 using round bottom 96-well plates. B cell stimulation was determined by staining for the  
459 activation marker CD86, which was quantified using flow cytometry.

460

#### 461 *Flow cytometry profiling of naïve B cells (CD19<sup>+</sup>CD27<sup>-</sup>) from SLE and HC subjects*

462

463 We used multicolor flow cytometry analysis to determine the subset distribution B cells  
464 in SLE and HC samples<sup>54,55</sup>. B cell subsets were phenotyped as follows: naïve B cells  
465 (CD19<sup>+</sup>CD10<sup>-</sup>CD21<sup>+</sup>IgD<sup>+</sup>), transitional B cells (CD19<sup>+</sup>CD10<sup>+</sup>CD38<sup>+</sup>), memory B cells  
466 (CD19<sup>+</sup>CD27<sup>+</sup>), plasma B cells (CD19<sup>+</sup>CD138<sup>+</sup>), and ABCs (CD19<sup>+</sup>CD10<sup>-</sup>CD21<sup>-</sup>  
467 CD85j<sup>+</sup>). Antibodies (and catalog numbers) used for flow cytometry were: FITC CD85j  
468 (555942, BD Biosciences), Brilliant Violet 421<sup>TM</sup> CD38 (303525, Biolegend),  
469 Brilliant Violet 650<sup>TM</sup> CD27 (302827, Biolegend), Brilliant Violet 785<sup>TM</sup> CD19  
470 (302239, Biolegend), APC/Cy7 CD3 (300425, Biolegend), APC/Cy7 CD14  
471 (561709, BD Biosciences), APC/Cy7 CD16(561726, BD Biosciences), PE-  
472 CF594 IgD (562540, BD Biosciences), PE/Cy7 CD21 (354911, Biolegend),  
473 BV605 CD24 (311123, Biolegend), PECy5 CD10 (15-0106-41, Thermo Fisher)  
474 and LIVE/DEAD<sup>TM</sup> Fixable Aqua Dead Cell Stain Kit (L34965, Thermo Fisher).

475

#### 476 *Sequential XIST RNA FISH and immunofluorescence (IF)*

477

478 Sequential XIST RNA fluorescence in situ hybridization (FISH) and IF was performed  
479 using established protocols<sup>31,32</sup>. Briefly, cells were cytopspun onto glass slides, then

480 incubated in ice-cold cytoskeletal (CSK) buffer containing 0.5% Triton for 3 min, fixed in  
481 4% paraformaldehyde for 10 min, and then dehydrated using an ethanol series. For  
482 human XIST RNA FISH, we used two Cy3 labelled oligonucleotide probes which target  
483 repetitive regions within *XIST* exons 1, 3 and 4<sup>31</sup>. Images were obtained using a Nikon  
484 Eclipse microscope and were categorized by the type of XIST RNA localization patterns  
485 as shown in Figure 1B and as described previously<sup>31,33,35</sup>. For IF analyses, slides were  
486 blocked for 30 min in blocking buffer (PBS with 0.2% Tween-20 and 5% BSA) and then  
487 incubated for 2 hours at room temperature with respective primary antibodies (at  
488 dilutions of 1:100): H3K27me3 (39155, Active Motif); Ubiquityl-histone H2A Lys119  
489 (8240, Cell Signaling); H3K4me3 (ab 213224, Abcam); MacroH2A1 (ab37264, Abcam).  
490 Slides were incubated with the appropriate FITC conjugated secondary antibody for 1  
491 hour at room temperature, then imaged using a fluorescence microscope.

492

#### 493 *quantitative RT-PCR*

494

495 For RT-QPCR, cDNA was synthesized from 1 µg of total RNA using Verso cDNA  
496 synthesis kit (Ref # AB-1453/A, Thermo Fisher, Waltham, MA, USA) and qPCR was  
497 performed using the QuantBio low ROX cyber green master mix (# 017707,  
498 Quantabio, Beverly, MA, USA). RPL13A gene was used as an endogenous control to  
499 normalize gene expression. RT-QPCR data were analyzed using  $\Delta\Delta C_t$  method<sup>5</sup>.  
500 RPL13A, F: GCCATCGTGGCTAAACAGGTA, R: GTTGGTGTTTCATCCGCTTGC;  
501 macroH2A1.1, F: GGCTTCACAGTCCTCTCCAC, R: GGTGAACGACAGCATCACTG;  
502 macroH2A1.2, F: GGCTTCACAGTCCTCTCCAC, R: GGATTGATTATGGCCTCCAC,  
503 XIST 5' end: F: TTGCCCTACTAGCTCCTCGGAC, R: TTCTCCAGATAGCTGGCAACC;  
504 XIST 3' end: F: CTACAAGCAGTG CAGAGAGC, R: CTAAGACAAGACACAGACCAC.

505

506

#### 507 *RNA-seq analysis of activated B cells from SLE patients and controls*

508

509 The processed gene expression file  
510 “GSE118254\_SLE.RNAseq.geneRpkm.detected.RPM.3.exon.csv.gz” was downloaded



511 from GEO dataset GSE118254  
512 (<https://www.ncbi.nlm.nih.gov/geo/query/acc.cgi?acc=GSE118254>). Statistical  
513 significance in gene expression between Healthy and SLE B cells was calculated using  
514 a one-way ANOVA in R (alpha = 0.05). A Z score was calculated for each sample/gene  
515 and heatmaps were generated using the gplots (heatmap.2) R package.

516

517 *Allele specific gene expression analyses using single cell RNAseq data*

518

519 Single cell RNAseq reads sequenced from individual naïve B cells, memory B cells,  
520 plasmablasts and transitional B cells were retrieved from a previously published study  
521 (Bioproject accession number PRJEB27270)<sup>38</sup>. In this study, a total of 117 cells,  
522 consisting of 30 naive B cells, 30 memory B cells, 30 plasmablasts and 27 transitional B  
523 cells, were sequenced from a single healthy woman. Public servers available through  
524 the Galaxy web platform ([usegalaxy.org](http://usegalaxy.org)) were used to analyze the data<sup>56</sup>. RNA-Seq  
525 reads were mapped to human reference genome (version hg19) using Bowtie<sup>57,58</sup>. Next,  
526 SNPs present in both X chromosomes were detected from alignment file using the  
527 FreeBayes variant detector tool ([www.geneious.com](http://www.geneious.com))<sup>59</sup> and SNPs were annotated using  
528 the ANNOVAR tool<sup>60</sup>. SNPs with less than 10 reads were excluded from the  
529 downstream analyses. For each SNP, if  $\leq 90\%$  of the reads carry the same SNP allele,  
530 expression was considered biallelic, otherwise expression was considered monoallelic  
531 for each gene. A gene was considered ‘biallelic’ in a cell-type subset if 2 or more cells  
532 from that subset were considered ‘biallelic’ as described above; a gene was considered  
533 “monoallelic” if 2 or more cells were biallelic and “uncalled” if no two cells were in  
534 agreement or there was insufficient data to make a call.

535

536 *Statistical analysis*

537

538 Linear regression was performed using a simple linear regression in GraphPad Prism 8  
539 of dependent variables (Xist RNA Cloud Type I-V) and independent variables (Date of  
540 blood draw for PBMC sample, SLE disease duration, Anti-Nuclear Antibody Titer,  
541 Systemic Lupus Erythematosus Disease Activity Index (SLEDAI) score and patient age

542 at blood draw). Measurements of percent Type I-IV XIST RNA clouds were analyzed  
543 using unpaired, two-tail t-tests, where significance is  $p < 0.05$ .

544  
545 *Study approval*

546  
547 For pediatric SLE patients, protocols and informed consent forms were approved by the  
548 CHOP Institutional Review Board (CHOP IRB Protocol 14-011433). For the adult SLE  
549 patients, the studies were approved by the Benaroya Research Institute Institutional  
550 Review Committee (IRB protocol number: 10059).

551  
552 **Figure Legends**

553  
554 **Figure 1: XIST RNA signals are missing from the Xi in human B cell populations.**

555 (A) Cartoon representing each type of XIST RNA localization pattern observed in  
556 human B cell subsets. (B) Sequential XIST RNA FISH (red) then immunofluorescence  
557 detection (green) for H2AK119-ubiquitin (Ub) for naïve B cells, memory B cells, age-  
558 associated B cells (ABCs), and plasma cells from healthy PBMCs. (C) Quantification of  
559 XIST RNA localization patterns from each B cell subset. Number of nuclei counted is  
560 shown above each sample at the top of the graph. Statistical significance for each XIST  
561 RNA localization pattern determined using one-way ANOVA;  $p$  values for each pattern  
562 shown. (D) Quantification of H2AK119Ub foci in human B cell subsets. Number of nuclei  
563 counted is shown above each sample at the top of the graph. (E) XIST RNA reads for  
564 naïve B, ABCs, and memory B cells from a previously published RNAseq dataset<sup>34</sup>.

565  
566 **Figure 2: Timing for XIST RNA localization to the Xi during human B cell**  
567 **stimulation, for naïve and memory B cells.** (A) Time course analysis for XIST RNA  
568 FISH to monitor XIST RNA localization changes after B cell stimulation using CpG, over

569 7 days. (B) CD86+ staining of *in vitro* activated B cells (day 1, day 2) to measure  
570 efficiency of *in vitro* stimulation. (C) Quantification of XIST RNA localization patterns for  
571 *in vitro* stimulated naïve B cells over 7 days in culture. Number of nuclei counted is  
572 shown above each sample at the top of the graph. Statistical significance determined  
573 using t-test comparing day 0 to day 2, for each type of XIST RNA localization pattern.  
574 (D) XIST RNA FISH for *in vitro* stimulated memory B cells using CpG, over 3 days. (E)  
575 Quantification of XIST RNA localization patterns for *in vitro* activated memory B cells  
576 over 3 days. Number of nuclei counted is shown above each sample at the top of the  
577 graph. Statistical significance determined using t-test comparing day 0 to day 3, for  
578 each type of XIST RNA localization pattern.

579

580 **Figure 3: Co-localization of XIST RNA and heterochromatin marks H2AK119Ub**  
581 **and H3K27me for *in vitro* activated human B cells.** Sequential XIST RNA FISH (red)  
582 followed by immunofluorescence detection (green) for (A) H2AK119Ub and (B)  
583 H3K27me3. Representative images (showing the same field) are shown. Quantification  
584 of co-localization patterns for XIST RNA and each heterochromatin mark at the Xi. Co-  
585 localization of XIST RNA (Types I, II) and IF focus (blue bars), XIST RNA signals alone  
586 (Type III; green), nuclei without either signal (purple), or IF focus (orange). Number of  
587 nuclei counted is above each sample.

588

589 **Figure 4: Biallelic expression of X-linked genes in human B cell populations.** (A)  
590 Schematic of the bioinformatics analysis pipeline to identify XCI escape genes in  
591 circulating memory B cells, naïve B cells, transitional B cells, and plasmablasts. (B)

592 Heatmap for all X-linked genes with detectable expression across the four human B cell  
593 subsets. Each individual cell is a column. Light blue indicates biallelic expression (Minor  
594 Allele Frequency (MAF)  $\geq 0.1$  for  $> 50\%$  of SNPs per gene), dark blue indicates  
595 monoallelic expression, and white is undetectable expression. Gene lists for individual  
596 SNPs in each cell (across B cell populations) are found in Supplemental Table 1, and  
597 complete list of all expressed X-linked genes is in Supplemental Table 2. (C) Expression  
598 of X-linked immunity-related genes across all four B cell populations. Individual cells for  
599 a particular B cell subset shown in columns; monoallelic expression (dark blue); biallelic  
600 expression (light blue). Supplemental Table 3 contains gene lists for each B cell subset.  
601 (D) Allelic expression summary for the X-linked immunity-related genes, either  
602 monoallelic (dark blue) or biallelic (light blue) across human B cell subsets. A gene was  
603 considered biallelic for a particular B cell subset if 2 or more cells within that group were  
604 biallelic. A gene was considered monoallelic for a B cell subset if 2 or more cells within  
605 that subset were monoallelic. Supplemental Table 4 contains complete list of X-linked  
606 immunity-related genes that were expressed in each B cell subset, along with allelic  
607 expression information.

608

609 **Figure 5: Peripheral B cells from pediatric SLE patients have mislocalized XIST**  
610 **RNA patterns and lack H2AK119Ub foci at the Xi.** (A) Representative XIST RNA  
611 FISH images from *in vitro* activated B cells (cultured 2 days) from one pediatric SLE  
612 patient (right) and a healthy age-matched control (left). (B) Quantification of Type I (left),  
613 Type II (center) and Type IV (right) XIST RNA localization patterns for *in vitro* activated  
614 B cells from pediatric SLE patients (red) and healthy controls (blue). Error bars denote

615 mean  $\pm$ SD, and statistical significance was determined using two-tailed unpaired t-test.  
616 (C) Quantification of H2AK119Ub foci for *in vitro* activated B cells from pediatric SLE  
617 patients and healthy control samples. Number of nuclei counted is above each sample;  
618 statistical significance comparing SLE to healthy controls was determined using two-  
619 tailed unpaired t-test. (D) Quantification of XIST RNA localization patterns for *in vitro*  
620 activated classical memory B cells, cultured for 3 days with CpG. Number of nuclei  
621 counted is above each sample; statistical significance comparing SLE to healthy  
622 controls was determined using two-tailed unpaired t-test for each pattern of XIST RNA  
623 localization.

624

625 **Figure 6: Peripheral B cells from adult SLE patients have mislocalized XIST RNA**  
626 **patterns and reduced H2AK119Ub foci at the Xi.** (A) Representative XIST RNA  
627 FISH images from *in vitro* activated B cells (cultured 2 days) from one adult SLE patient  
628 (right) and a healthy age-matched control (left). (B) Quantification of Type I (left), Type II  
629 (center) and Type IV (right) XIST RNA localization patterns for *in vitro* activated B cells  
630 from adult SLE patients (red) and healthy controls (blue). Error bars denote mean  $\pm$ -  
631 SD, and statistical significance was determined using two-tailed unpaired t-test. (C)  
632 Quantification of co-localization patterns for XIST RNA and H2AK119Ub at the Xi, for *in*  
633 *vitro* activated B cells from adult SLE patients and healthy control samples. Co-  
634 localization of XIST RNA (Types I, II) and IF focus (blue bars), XIST RNA signals alone  
635 (Type III; green), nuclei without either signal (purple), or IF focus (orange). Number of  
636 nuclei counted is above each sample; statistical significance comparing SLE to healthy

637 controls was determined using two-tailed unpaired t-test for each pattern of XIST RNA  
638 localization.

639

640 **Figure 7: X-linked gene expression and XIST RNA Interactome genes are altered**

641 **in SLE patient activated B cells.** (A) X-linked Differentially Expressed Genes (DEGs;

642 53 genes) in adult healthy controls (6 female samples) and SLE patient (7 female

643 samples) activated B cells in circulation. Color gradient represents row Z-scores for

644 each gene. Gene symbols in color denote XCI escape: orange are immunity-related

645 genes that may escape in activated B cells; green are known XCI escape genes in other

646 somatic cells; blue are putative XCI escape based on Supplemental Table 3. Note that

647 all 4 genes in orange exhibited XCI escape in at least 1 B cell subset in Supplemental

648 Table 3, and are denoted with (e). (B) Volcano plot showing X-linked DEGs in activated

649 B cells. Genes significantly upregulated in SLE patients are in red; genes significantly

650 downregulated in SLE are in blue ( $p < 0.05$ ). (C) XIST RNA binding protein genes that

651 are differentially expressed in activated B cells from SLE patients and healthy controls.

652 Nuclear matrix/nuclear envelop genes in blue; cell metabolism/cell growth genes in

653 green; chromatin regulators in orange; XIST RNA binding protein genes whose

654 expression was also altered in SLE patient T cells in pink.

655

656 **Supplemental Figure 1: Steady-state XIST RNA transcript levels in human naïve**

657 **and *in vitro* stimulated B cells.** Primer sets for 5' XIST (spanning exons 1 and 3) and

658 3' XIST (spanning exons 5 and 6) were used for qRT-PCR analysis of XIST RNA in

659 naïve (blue) and *in vitro* stimulated (orange) B cells. Relative fold change is shown, with

660 values normalized to naïve B cells (set as 1). Standard error of the mean is shown with  
661 error bars.

662

663 **Supplemental Figure 2: macroH2A is not uniformly enriched on the Xi in activated**  
664 **B cells in healthy donors.** (A) Sequential XIST RNA FISH (red) followed by  
665 immunofluorescence detection of histone variant macroH2A (green). Representative  
666 field is shown, and arrowheads indicate macroH2A foci that co-localize with XIST RNA  
667 signal. (B) Quantification of XIST RNA localization patterns that co-localize with  
668 macroH2A foci. Number of nuclei counted is above each sample. (C) qRT-PCR  
669 analyses of macroH2A1.1 and macroH2A1.2 transcripts in naïve and *in vitro* stimulated  
670 (day 2) B cells (*left*). qRT-PCR analyses of both macroH2A1 variants for naïve and  
671 stimulated B cells compared to 293T, a human embryonic kidney fibroblast cell line  
672 (*right*). Statistical significance determined using one-way ANOVA across three cell types  
673 for each variant.

674

675 **Supplemental Figure 3: Sequential XIST RNA FISH and IF detection of the active**  
676 **chromatin modification H3K4me3.** (A) Representative field image for XIST RNA FISH  
677 (red) and sequential IF for H3K4me3 (green). The arrowheads indicate H3K4me3  
678 'holes' that overlap XIST RNA signals. (B) Quantification of XIST RNA localization  
679 patterns and H3K4me3 'holes'. Number of nuclei counted is above each sample.

680

681 **Supplemental Figure 4: XIST RNA localization patterns for naïve and *in vitro***  
682 **stimulated B cells (day 2) from pediatric SLE patients and healthy age-matched**

683 **controls.** (A) Quantification of XIST RNA localization patterns for naïve B cells. Number  
684 of nuclei counted is above each sample. (B) Quantification of XIST RNA localization  
685 patterns for *in vitro* stimulated (day 2) B cells using CpG. Number of nuclei counted is  
686 above each sample. (C) Representative flow cytometry analysis for CD86 staining,  
687 using unstained cells, naïve B (unstimulated), and day 2 stimulated B cells for a healthy  
688 control sample and one pediatric SLE patient sample (SLE 17). (D) Quantification of  
689 XIST RNA localization patterns for *in vitro* stimulated memory B cells from pediatric SLE  
690 patients and healthy controls. Number of nuclei counted is above each sample.  
691 Statistical significance determined using two-tailed test with unequal variance,  
692 comparing SLE to healthy controls. P values for each localization pattern of XIST RNA  
693 are shown.

694

695 **Supplemental Figure 5: Flow cytometry analyses of B cell populations from**  
696 **PBMCs of adult and pediatric SLE patients and age-matched healthy controls.** (A)  
697 Typical gating strategy for B cell subsets from patient PBMCs recovered post-thaw,  
698 following B cell isolation and selection for CD27<sup>-</sup> cells. (B) CD27<sup>-</sup> B cell population  
699 percentages for healthy control (HC) and SLE patients. Average percentages are shown  
700 in bold, at the bottom of each group. Pediatric samples are denoted as “P2”. Statistical  
701 significance determined using two-tailed t-tests comparing healthy controls to SLE, for  
702 each B cell subset. Only ABCs were significantly different among SLE and HC  
703 samples, yet comprise less than 2% of total B cells.

704



705 **Supplemental Figure 6: XIST RNA localization patterns for *in vitro* stimulated B**  
706 **cells (day 2) from adult SLE patients and healthy age-matched controls.** Number of  
707 nuclei counted is above each sample. Statistical significance was determined using two-  
708 tailed unpaired t-test for each pattern of XIST RNA localization, comparing SLE to  
709 healthy controls. SLE samples 580-253 and 342-184 are male individuals, and are  
710 included as negative controls.

711

712 **Supplemental Figure 7: Correlations between XIST RNA localization patterns and**  
713 **autoimmunity comorbidities and medications.** Bar graphs show percent of activated  
714 B cells with XIST RNA localization patterns Type I-IV (A-D) in SLE patients with or  
715 without thyroid disease or Sjogren's Syndrome. Red, green, and blue bar graph pairs  
716 represent significant differences between group means. Bar graphs show percent of  
717 activated B cells with XIST RNA localization patterns Type I-IV (A-D) for adult SLE  
718 patients. The paired bar graphs consist of patients taking (left) or not taking (right) the  
719 designated medication. Blue bar graph pairs represent significant differences between  
720 group means; statistical significance determined without correction for multiple  
721 comparisons with  $\alpha=0.05$ . Each row was analyzed individually, without assuming a  
722 consistent SD. HCQ: hydroxychloroquine; mycophen. mofetil: mycophenolate mofetil.  
723 (E) SLE patients taking HCQ have significantly higher percentages of Type I XIST RNA  
724 localization patterns. Dotplot showing percentages of B cells for groups of HC and SLE  
725 patients for each type of XIST RNA localization pattern. Black circles represent  
726 individuals not taking HCQ; aqua triangles are SLE patients taking HCQ. Horizontal  
727 bars show median values of patients taking HCQ (aqua) or other medications (black).

728 Only Type I XIST RNA patterns were statistically significant among SLE patients for  
729 HCQ treatment. Statistical significance determined using two-tailed t test.

730

731 **Supplemental Figure 8: Linear regression analyses of SLE patient disease**  
732 **parameters.** (A) SLE disease parameters (ANA Titer, SLEDAI score, disease duration),  
733 patient age, and sample draw date were correlated with each XIST RNA localization  
734 pattern for *in vitro* activated adult SLE B cell samples. (B) Correlation between age and  
735 XIST RNA localization patterns for SLE patients (*left*) and healthy controls (*right*). XIST  
736 RNA Type IV patterns increased with age for SLE patients; there were no significant  
737 correlations between age and XIST RNA localization patterns for healthy controls.

738

#### 739 **Acknowledgements**

740

741 We would like to thank C. Berry for statistical consultation for correlation analyses; N.  
742 Jiwrajka and L. King for assistance with editing of the manuscript, and all members of  
743 the Anguera lab for helpful discussions. This research was supported by a University  
744 Research Foundation grant, a American Chemical Society grant, a McCabe Foundation  
745 grant), NIH R21 AI124084, NICHD 5K12 HD085848-03, NIH R01 AI 134834, DOD grant  
746 LR170055: W81XWH-18-1-06 (to MCA); and NIH 1F32AI154797 to SP.

747

#### 748 **Author contributions**

749

750 S. Pyfrom performed the bioinformatic analyses for single-cell RNAseq data sets, the  
751 bioinformatic analyses using human activated B cell RNAseq data sets, and the linear  
752 regression analyses for XIST RNA localization and comorbidities, and made  
753 corresponding supplementary tables and figures. B. Paneru performed the human B cell  
754 isolation and *in vitro* culture, the XIST RNA FISH and IF experiments on human B cell  
755 subsets, and quantified the localization patterns for SLE patients and controls. J. Knox  
756 and B. Paneru performed the flow cytometry and FACS isolation experiments. MCA

757 made figures 1, 2, 3, 5, 6 in main text and supplementary figures S1, S2, S3, S4, S5,  
758 S6, S6. MCA and S. Pyfrom wrote the manuscript.

759  
760

## 761 **Competing interests**

762

763 None to declare.

764

765

766

767

768

769

770

## 770 REFERENCES

771

772 1 Wei, C. *et al.* A new population of cells lacking expression of CD27 represents a  
773 notable component of the B cell memory compartment in systemic lupus  
774 erythematosus. *J Immunol* **178**, 6624-6633, doi:10.4049/jimmunol.178.10.6624  
775 (2007).

776 2 Nicholas, M. W. *et al.* A novel subset of memory B cells is enriched in  
777 autoreactivity and correlates with adverse outcomes in SLE. *Clin Immunol* **126**,  
778 189-201, doi:10.1016/j.clim.2007.10.004 (2008).

779 3 Tipton, C. M. *et al.* Diversity, cellular origin and autoreactivity of antibody-  
780 secreting cell population expansions in acute systemic lupus erythematosus. *Nat*  
781 *Immunol* **16**, 755-765, doi:10.1038/ni.3175 (2015).

782 4 Rubtsov, A. V., Rubtsova, K., Kappler, J. W. & Marrack, P. TLR7 drives  
783 accumulation of ABCs and autoantibody production in autoimmune-prone mice.  
784 *Immunol Res* **55**, 210-216, doi:10.1007/s12026-012-8365-8 (2013).

785 5 Hao, Y., O'Neill, P., Naradikian, M. S., Scholz, J. L. & Cancro, M. P. A B-cell  
786 subset uniquely responsive to innate stimuli accumulates in aged mice. *Blood*  
787 **118**, 1294-1304, doi:10.1182/blood-2011-01-330530 (2011).

788 6 Libert, C., Dejager, L. & Pinheiro, I. The X chromosome in immune functions:  
789 when a chromosome makes the difference. *Nat Rev Immunol* **10**, 594-604,  
790 doi:10.1038/nri2815 (2010).

791 7 Liu, K. *et al.* X Chromosome Dose and Sex Bias in Autoimmune Diseases:  
792 Increased 47,XXX in Systemic Lupus Erythematosus and Sjogren's Syndrome.  
793 *Arthritis Rheumatol*, doi:10.1002/art.39560 (2015).

794 8 Ross, M. T. *et al.* The DNA sequence of the human X chromosome. *Nature* **434**,  
795 325-337, doi:10.1038/nature03440 (2005).

796 9 Bianchi, I., Lleo, A., Gershwin, M. E. & Invernizzi, P. The X chromosome and  
797 immune associated genes. *J Autoimmun* **38**, J187-192,  
798 doi:10.1016/j.jaut.2011.11.012 (2012).

799 10 Garcia-Ortiz, H. *et al.* Association of TLR7 copy number variation with  
800 susceptibility to childhood-onset systemic lupus erythematosus in Mexican  
801 population. *Ann Rheum Dis* **69**, 1861-1865, doi:10.1136/ard.2009.124313 (2010).

- 802 11 Desai-Mehta, A., Lu, L., Ramsey-Goldman, R. & Datta, S. K. Hyperexpression of  
803 CD40 ligand by B and T cells in human lupus and its role in pathogenic  
804 autoantibody production. *J Clin Invest* **97**, 2063-2073, doi:10.1172/JCI118643  
805 (1996).
- 806 12 Vadasz, Z. *et al.* The Expansion of CD25 high IL-10 high FoxP3 high B  
807 Regulatory Cells Is in Association with SLE Disease Activity. *J Immunol Res*  
808 **2015**, 254245, doi:10.1155/2015/254245 (2015).
- 809 13 Kong, W. *et al.* Increased expression of Bruton's tyrosine kinase in peripheral  
810 blood is associated with lupus nephritis. *Clin Rheumatol* **37**, 43-49,  
811 doi:10.1007/s10067-017-3717-3 (2018).
- 812 14 Pisitkun, P. *et al.* Autoreactive B cell responses to RNA-related antigens due to  
813 TLR7 gene duplication. *Science* **312**, 1669-1672, doi:10.1126/science.1124978  
814 (2006).
- 815 15 Subramanian, S. *et al.* A Tlr7 translocation accelerates systemic autoimmunity in  
816 murine lupus. *Proc Natl Acad Sci U S A* **103**, 9970-9975,  
817 doi:10.1073/pnas.0603912103 (2006).
- 818 16 Fairhurst, A. M. *et al.* Yaa autoimmune phenotypes are conferred by  
819 overexpression of TLR7. *Eur J Immunol* **38**, 1971-1978,  
820 doi:10.1002/eji.200838138 (2008).
- 821 17 Hwang, S. H. *et al.* B cell TLR7 expression drives anti-RNA autoantibody  
822 production and exacerbates disease in systemic lupus erythematosus-prone  
823 mice. *J Immunol* **189**, 5786-5796, doi:10.4049/jimmunol.1202195 (2012).
- 824 18 Kil, L. P. *et al.* Btk levels set the threshold for B-cell activation and negative  
825 selection of autoreactive B cells in mice. *Blood* **119**, 3744-3756,  
826 doi:10.1182/blood-2011-12-397919 (2012).
- 827 19 Corneth, O. B. *et al.* Enhanced Expression of Bruton's Tyrosine Kinase in B Cells  
828 Drives Systemic Autoimmunity by Disrupting T Cell Homeostasis. *J Immunol* **197**,  
829 58-67, doi:10.4049/jimmunol.1600208 (2016).
- 830 20 Lyon, M. F. Gene action in the X-chromosome of the mouse (*Mus musculus* L.).  
831 *Nature* **190**, 372-373 (1961).
- 832 21 Payer, B. & Lee, J. T. X chromosome dosage compensation: how mammals  
833 keep the balance. *Annu Rev Genet* **42**, 733-772,  
834 doi:10.1146/annurev.genet.42.110807.091711 (2008).
- 835 22 Plath, K. *et al.* Role of histone H3 lysine 27 methylation in X inactivation. *Science*  
836 **300**, 131-135, doi:10.1126/science.1084274  
837 1084274 [pii] (2003).
- 838 23 Silva, J. *et al.* Establishment of histone h3 methylation on the inactive X  
839 chromosome requires transient recruitment of Eed-Enx1 polycomb group  
840 complexes. *Dev Cell* **4**, 481-495, doi:S1534580703000686 [pii] (2003).
- 841 24 Cotton, A. M. *et al.* Landscape of DNA methylation on the X chromosome reflects  
842 CpG density, functional chromatin state and X-chromosome inactivation. *Hum*  
843 *Mol Genet* **24**, 1528-1539, doi:10.1093/hmg/ddu564 (2015).
- 844 25 Sharp, A. J. *et al.* DNA methylation profiles of human active and inactive X  
845 chromosomes. *Genome Res* **21**, 1592-1600, doi:10.1101/gr.112680.110 (2011).

- 846 26 Brockdorff, N. *et al.* Conservation of position and exclusive expression of mouse  
847 Xist from the inactive X chromosome. *Nature* **351**, 329-331,  
848 doi:10.1038/351329a0 (1991).
- 849 27 Brown, C. J. *et al.* A gene from the region of the human X inactivation centre is  
850 expressed exclusively from the inactive X chromosome. *Nature* **349**, 38-44,  
851 doi:10.1038/349038a0 (1991).
- 852 28 Penny, G. D., Kay, G. F., Sheardown, S. A., Rastan, S. & Brockdorff, N.  
853 Requirement for Xist in X chromosome inactivation. *Nature* **379**, 131-137,  
854 doi:10.1038/379131a0 (1996).
- 855 29 Carrel, L. & Willard, H. F. X-inactivation profile reveals extensive variability in X-  
856 linked gene expression in females. *Nature* **434**, 400-404,  
857 doi:10.1038/nature03479 (2005).
- 858 30 Balaton, B. P., Cotton, A. M. & Brown, C. J. Derivation of consensus inactivation  
859 status for X-linked genes from genome-wide studies. *Biol Sex Differ* **6**, 35,  
860 doi:10.1186/s13293-015-0053-7 (2015).
- 861 31 Wang, J. *et al.* Unusual maintenance of X chromosome inactivation predisposes  
862 female lymphocytes for increased expression from the inactive X. *Proc Natl Acad*  
863 *Sci U S A*, doi:10.1073/pnas.1520113113 (2016).
- 864 32 Syrett, C. M. *et al.* Altered X-chromosome inactivation in T cells may promote  
865 sex-biased autoimmune diseases. *JCI Insight* **4**, doi:10.1172/jci.insight.126751  
866 (2019).
- 867 33 Syrett, C. M. *et al.* Diversity of Epigenetic Features of the Inactive X-  
868 Chromosome in NK Cells, Dendritic Cells, and Macrophages. *Front Immunol* **9**,  
869 3087, doi:10.3389/fimmu.2018.03087 (2018).
- 870 34 Wang, S. *et al.* IL-21 drives expansion and plasma cell differentiation of  
871 autoreactive CD11c(hi)T-bet(+) B cells in SLE. *Nat Commun* **9**, 1758,  
872 doi:10.1038/s41467-018-03750-7 (2018).
- 873 35 Syrett, C. M. *et al.* Loss of Xist RNA from the inactive X during B cell  
874 development is restored in a dynamic YY1-dependent two-step process in  
875 activated B cells. *PLoS Genet* **13**, e1007050, doi:10.1371/journal.pgen.1007050  
876 (2017).
- 877 36 Ridings-Figueroa, R. *et al.* The nuclear matrix protein CIZ1 facilitates localization  
878 of Xist RNA to the inactive X-chromosome territory. *Genes Dev* **31**, 876-888,  
879 doi:10.1101/gad.295907.117 (2017).
- 880 37 Lessing, D., Anguera, M. C. & Lee, J. T. X Chromosome Inactivation and  
881 Epigenetic Responses to Cellular Reprogramming. *Annu Rev Genomics Hum*  
882 *Genet*, doi:10.1146/annurev-genom-091212-153530 (2013).
- 883 38 Rizzetto, S. *et al.* B-cell receptor reconstruction from single-cell RNA-seq with  
884 VDJPuzzle. *Bioinformatics* **34**, 2846-2847, doi:10.1093/bioinformatics/bty203  
885 (2018).
- 886 39 Souyris, M. *et al.* TLR7 escapes X chromosome inactivation in immune cells. *Sci*  
887 *Immunol* **3**, doi:10.1126/sciimmunol.aap8855 (2018).
- 888 40 Scharer, C. D. *et al.* Epigenetic programming underpins B cell dysfunction in  
889 human SLE. *Nat Immunol* **20**, 1071-1082, doi:10.1038/s41590-019-0419-9  
890 (2019).

- 891 41 Chu, C. *et al.* Systematic discovery of Xist RNA binding proteins. *Cell* **161**, 404-  
892 416, doi:10.1016/j.cell.2015.03.025 (2015).
- 893 42 McHugh, C. A. *et al.* The Xist lncRNA interacts directly with SHARP to silence  
894 transcription through HDAC3. *Nature* **521**, 232-236, doi:10.1038/nature14443  
895 (2015).
- 896 43 Minajigi, A. *et al.* Chromosomes. A comprehensive Xist interactome reveals  
897 cohesin repulsion and an RNA-directed chromosome conformation. *Science* **349**,  
898 doi:10.1126/science.aab2276 (2015).
- 899 44 Monfort, A. *et al.* Identification of Spen as a Crucial Factor for Xist Function  
900 through Forward Genetic Screening in Haploid Embryonic Stem Cells. *Cell Rep*  
901 **12**, 554-561, doi:10.1016/j.celrep.2015.06.067 (2015).
- 902 45 Tangye, S. G., Avery, D. T., Deenick, E. K. & Hodgkin, P. D. Intrinsic differences  
903 in the proliferation of naive and memory human B cells as a mechanism for  
904 enhanced secondary immune responses. *J Immunol* **170**, 686-694,  
905 doi:10.4049/jimmunol.170.2.686 (2003).
- 906 46 Klein, S. L. & Flanagan, K. L. Sex differences in immune responses. *Nat Rev*  
907 *Immunol* **16**, 626-638, doi:10.1038/nri.2016.90 (2016).
- 908 47 O'Driscoll, D. N. *et al.* Expression of X-linked Toll-like receptor 4 signaling genes  
909 in female vs. male neonates. *Pediatr Res* **81**, 831-837, doi:10.1038/pr.2017.2  
910 (2017).
- 911 48 Tukiainen, T. *et al.* Landscape of X chromosome inactivation across human  
912 tissues. *Nature* **550**, 244-248, doi:10.1038/nature24265 (2017).
- 913 49 Syrett, C. M., Sierra, I., Beethem, Z. T., Dubin, A. H. & Anguera, M. C. Loss of  
914 epigenetic modifications on the inactive X chromosome and sex-biased gene  
915 expression profiles in B cells from NZB/W F1 mice with lupus-like disease. *J*  
916 *Autoimmun*, 102357, doi:10.1016/j.jaut.2019.102357 (2019).
- 917 50 Deng, X. *et al.* Bipartite structure of the inactive mouse X chromosome. *Genome*  
918 *Biol* **16**, 152, doi:10.1186/s13059-015-0728-8 (2015).
- 919 51 Giorgetti, L. *et al.* Structural organization of the inactive X chromosome in the  
920 mouse. *Nature* **535**, 575-579, doi:10.1038/nature18589 (2016).
- 921 52 Splinter, E. *et al.* The inactive X chromosome adopts a unique three-dimensional  
922 conformation that is dependent on Xist RNA. *Genes Dev* **25**, 1371-1383,  
923 doi:10.1101/gad.633311 (2011).
- 924 53 Chen, C. K. *et al.* Xist recruits the X chromosome to the nuclear lamina to enable  
925 chromosome-wide silencing. *Science* **354**, 468-472,  
926 doi:10.1126/science.aae0047 (2016).
- 927 54 Knox, J. J. *et al.* T-bet<sup>+</sup> B cells are induced by human viral infections and  
928 dominate the HIV gp140 response. *JCI Insight* **2**, doi:10.1172/jci.insight.92943  
929 (2017).
- 930 55 Johnson, J. L. *et al.* The Transcription Factor T-bet Resolves Memory B Cell  
931 Subsets with Distinct Tissue Distributions and Antibody Specificities in Mice and  
932 Humans. *Immunity* **52**, 842-855 e846, doi:10.1016/j.immuni.2020.03.020 (2020).
- 933 56 Afgan, E. *et al.* The Galaxy platform for accessible, reproducible and  
934 collaborative biomedical analyses: 2016 update. *Nucleic Acids Res* **44**, W3-W10,  
935 doi:10.1093/nar/gkw343 (2016).

- 936 57 Langmead, B. & Salzberg, S. L. Fast gapped-read alignment with Bowtie 2. *Nat*  
937 *Methods* **9**, 357-359, doi:10.1038/nmeth.1923 (2012).
- 938 58 Langmead, B., Trapnell, C., Pop, M. & Salzberg, S. L. Ultrafast and memory-  
939 efficient alignment of short DNA sequences to the human genome. *Genome Biol*  
940 **10**, R25, doi:10.1186/gb-2009-10-3-r25 (2009).
- 941 59 Garrison, E., Marth, G. Haplotype-based variant detection from short-read  
942 sequencing. *arXiv arXiv:1207.3907* (2012).
- 943 60 Wang, K., Li, M. & Hakonarson, H. ANNOVAR: functional annotation of genetic  
944 variants from high-throughput sequencing data. *Nucleic Acids Res* **38**, e164,  
945 doi:10.1093/nar/gkq603 (2010).
- 946

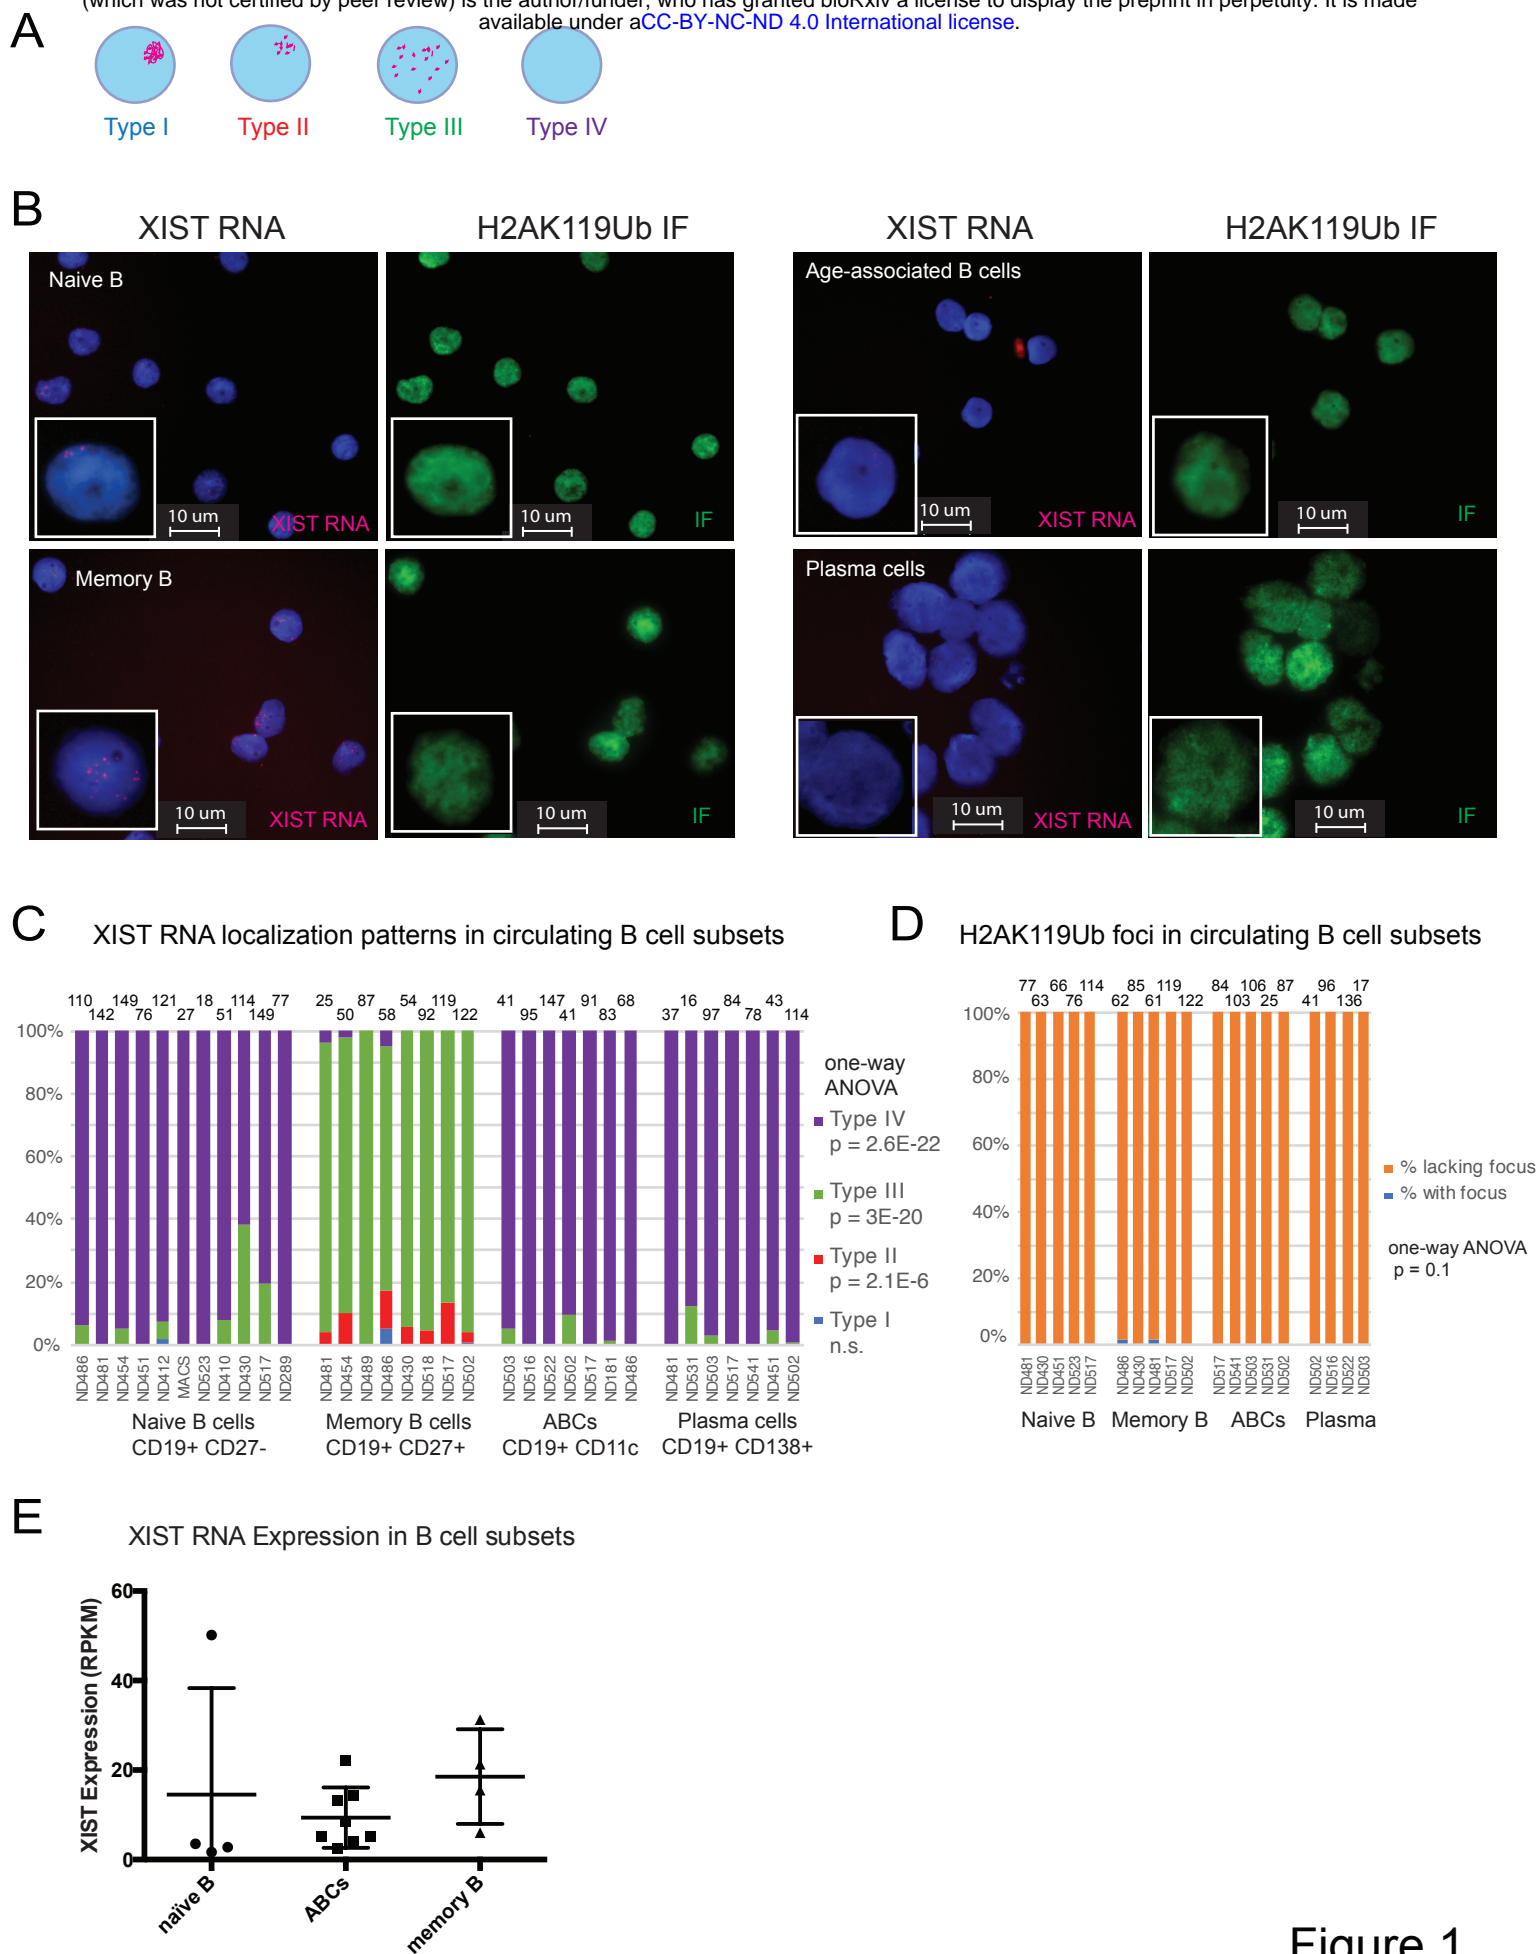

Figure 1



A

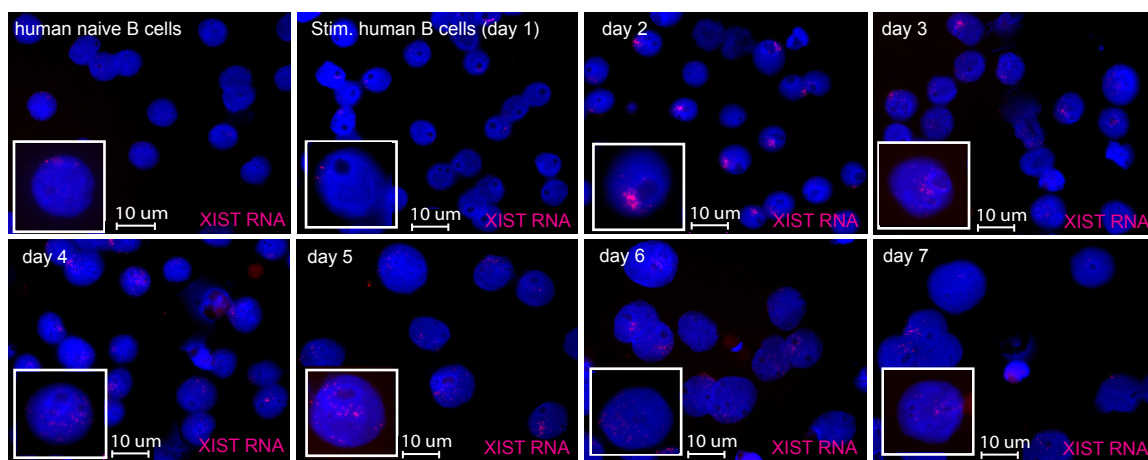

B

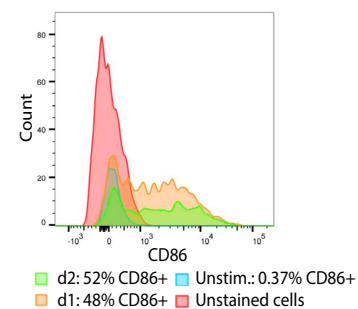

C

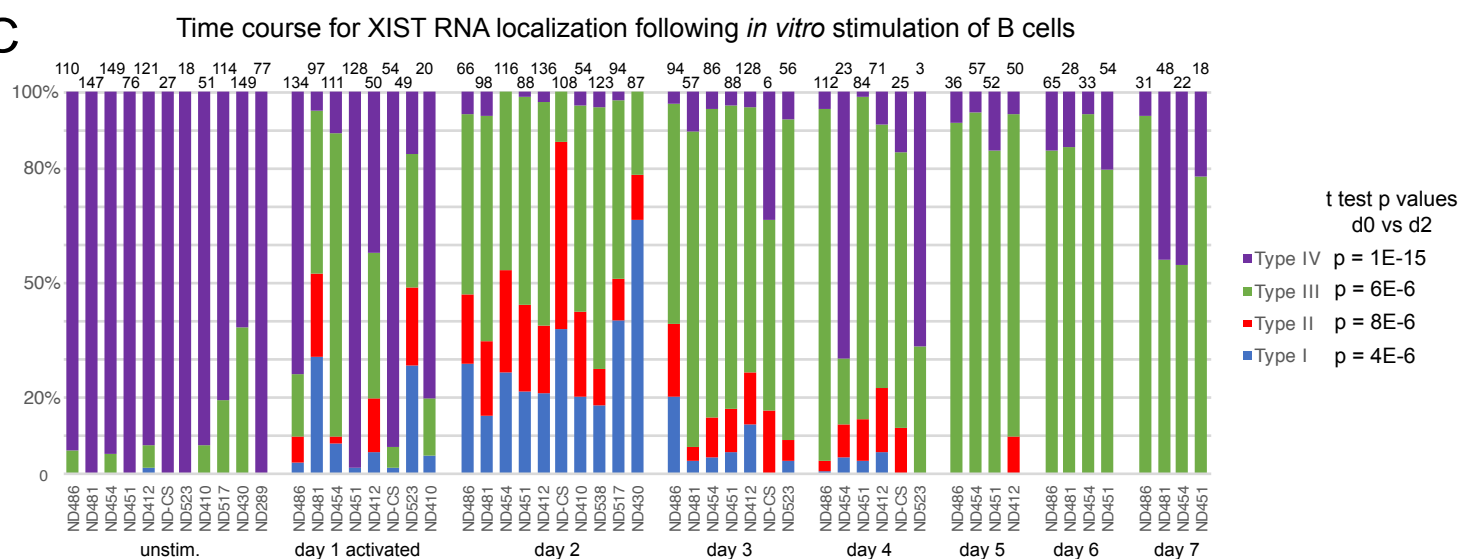

D

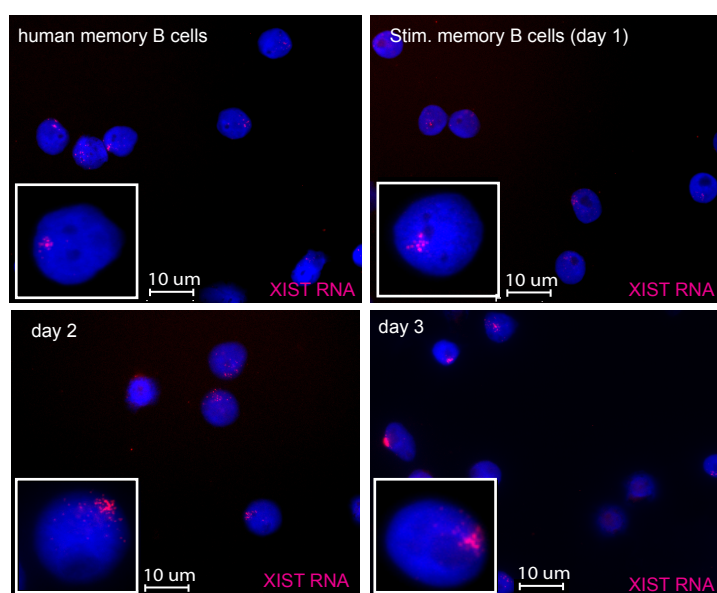

E XIST RNA localization following *in vitro* stimulation of memory B cells

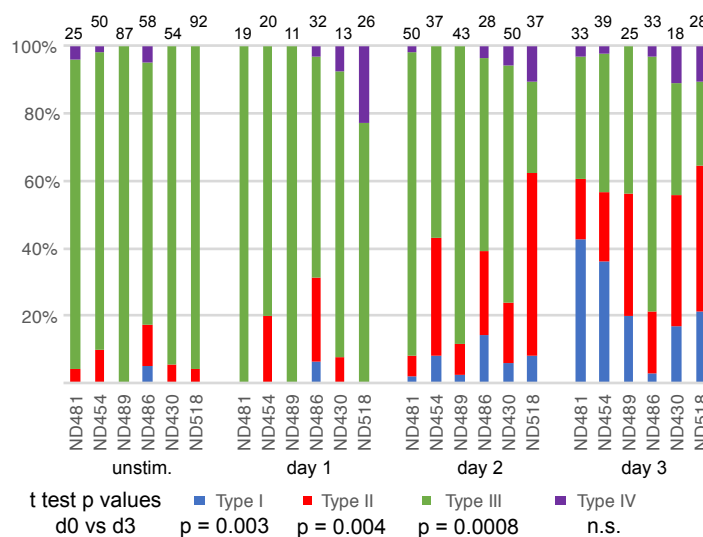

Figure 2

A

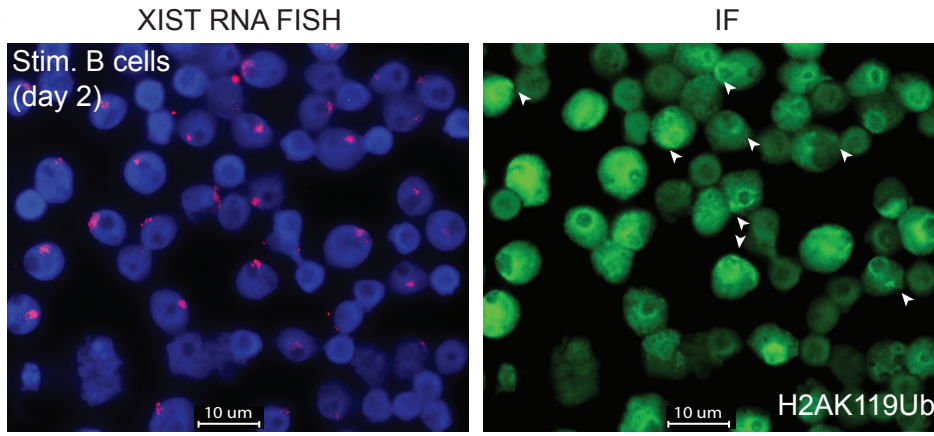

H2AK119Ub foci co-localization with XIST RNA in stimulated B cells

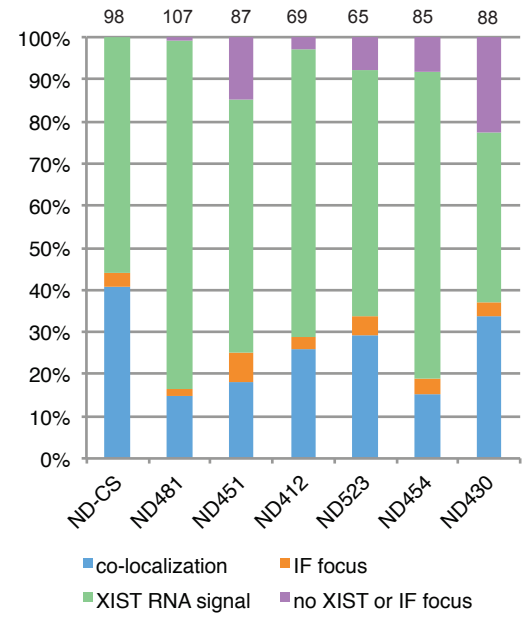

B

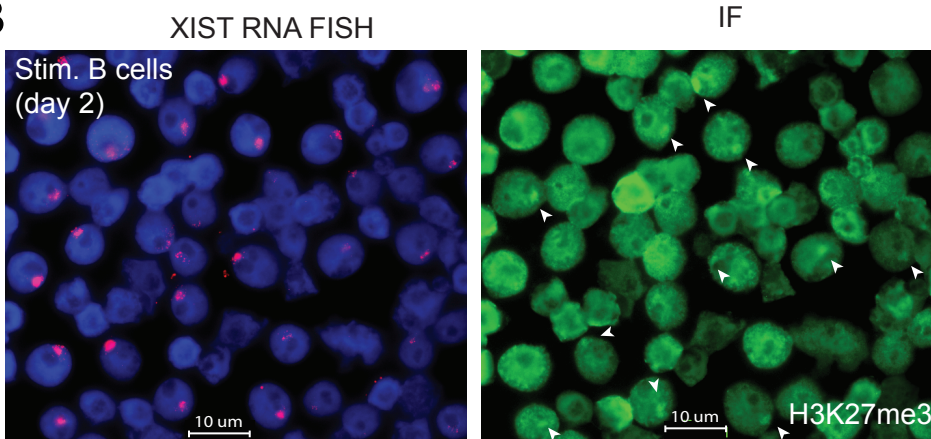

H3K27me3 foci co-localization with XIST RNA in stimulated B cells

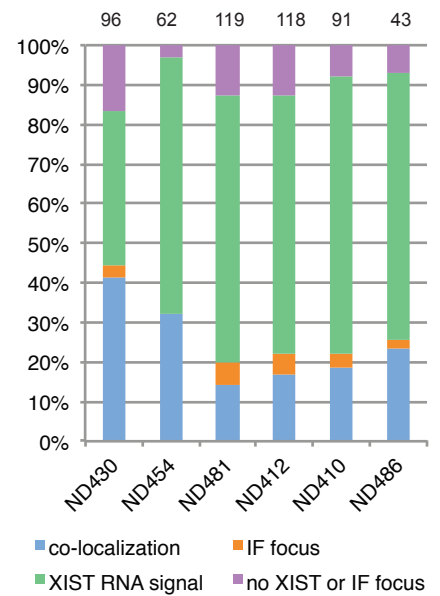

Figure 3

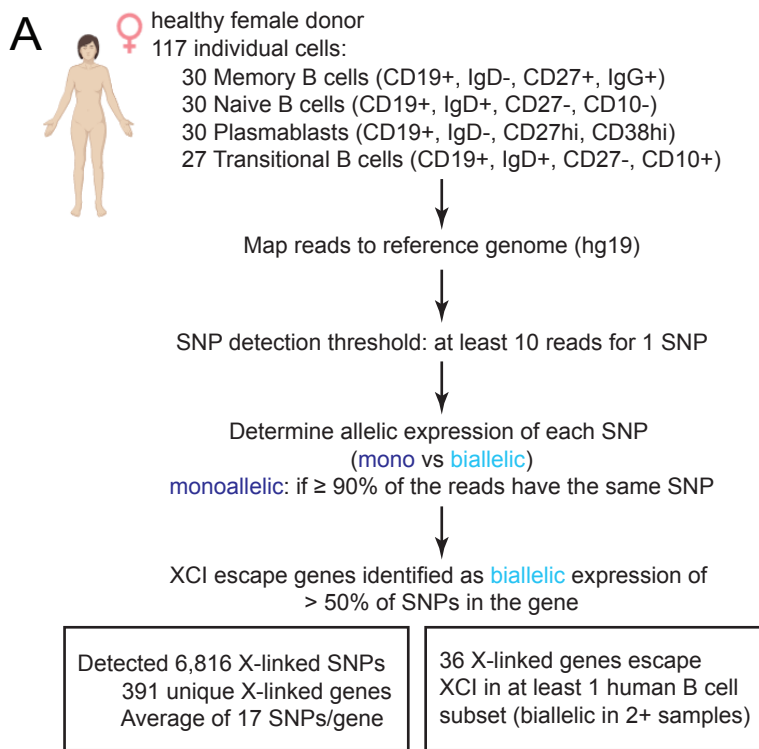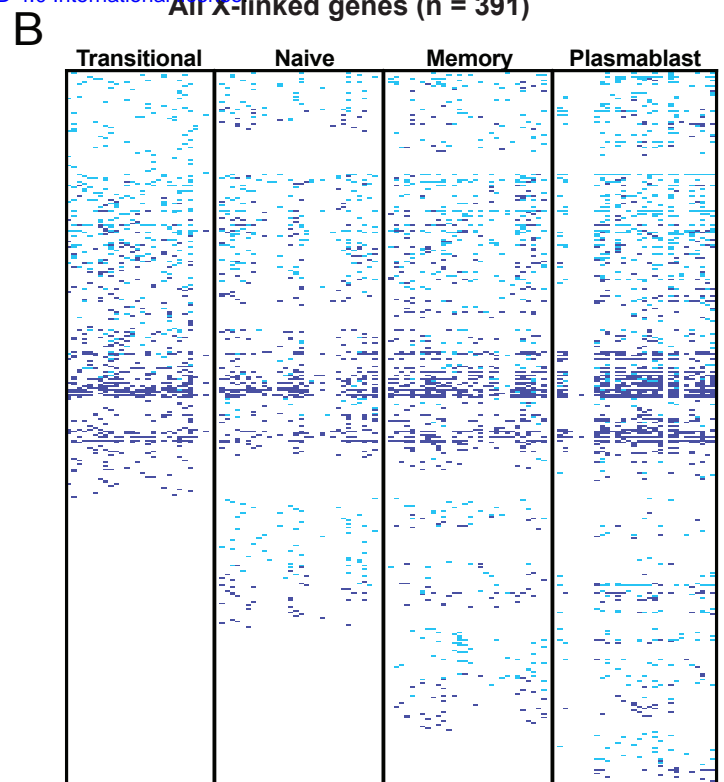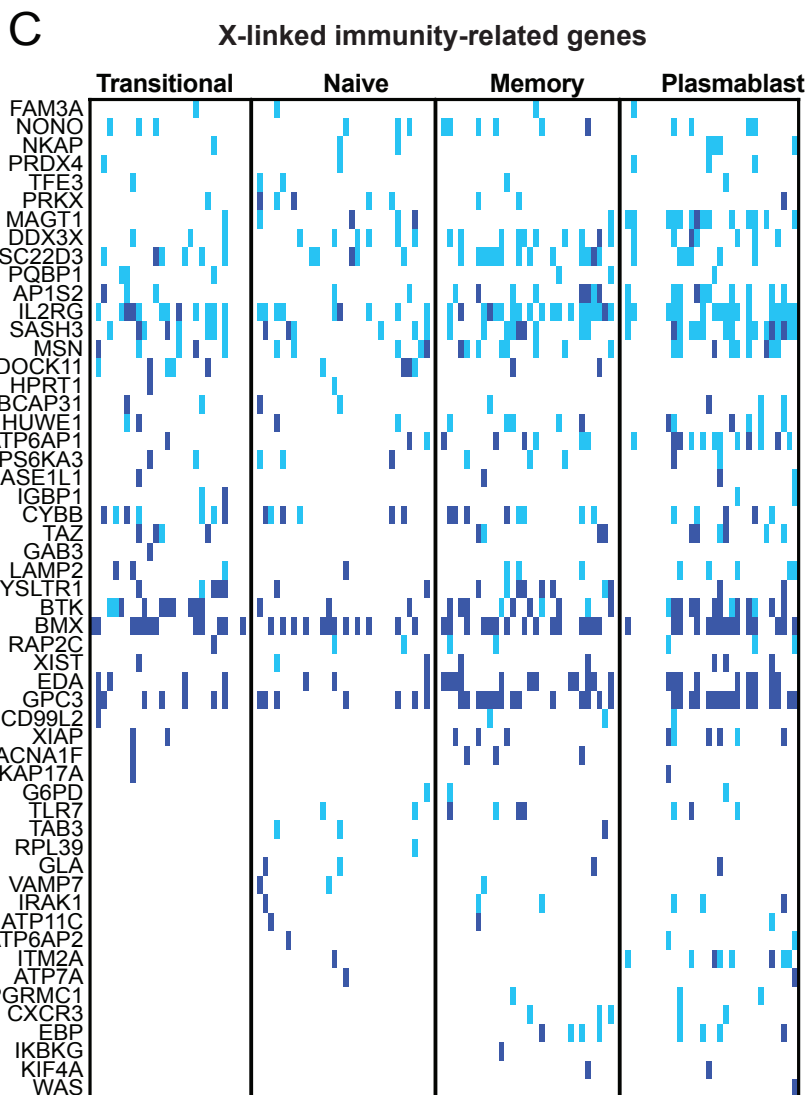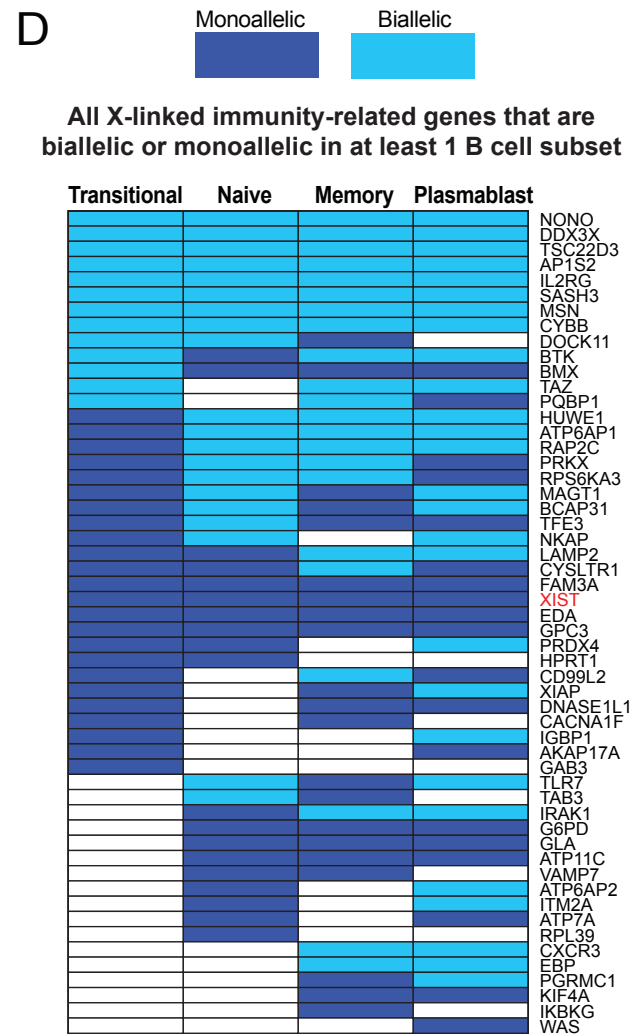

Figure 4

A

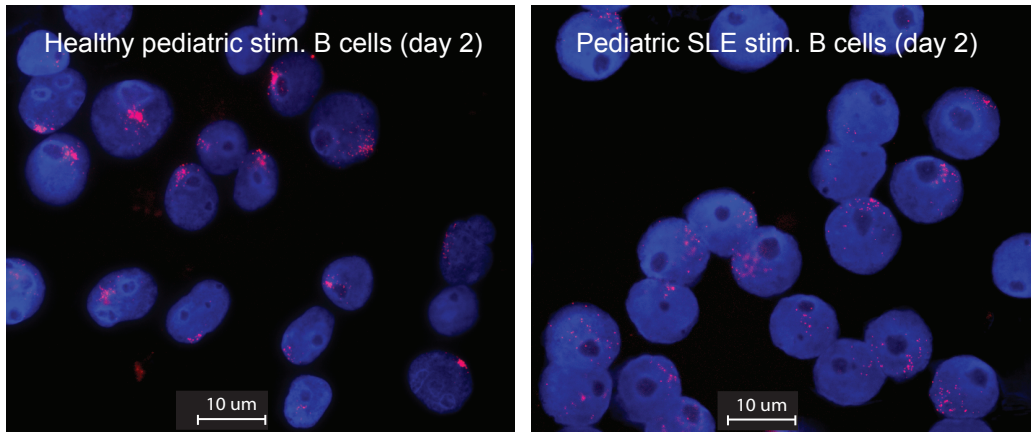

B

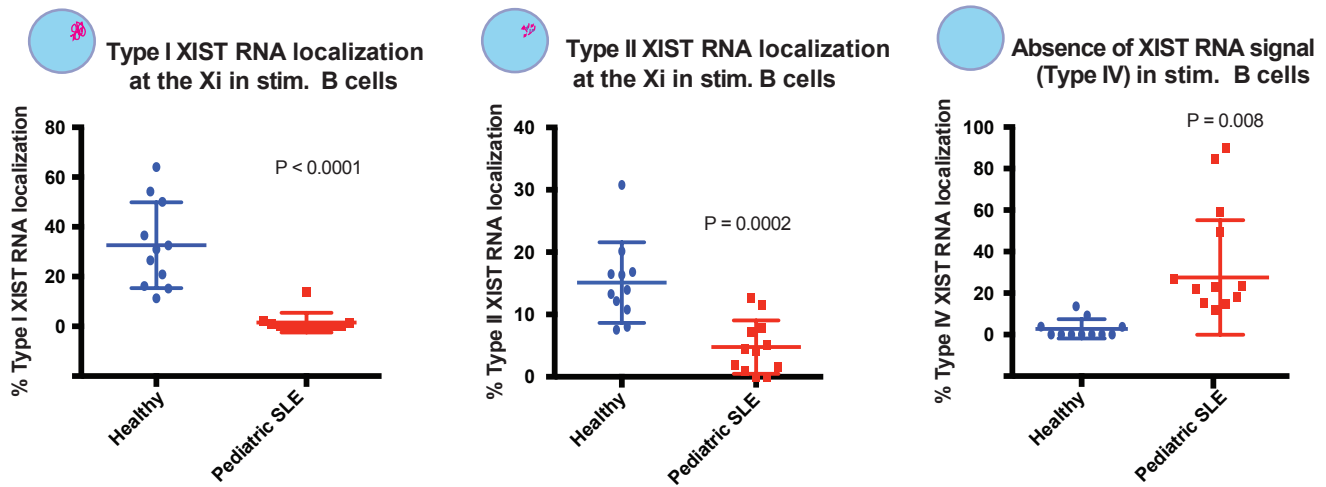

C

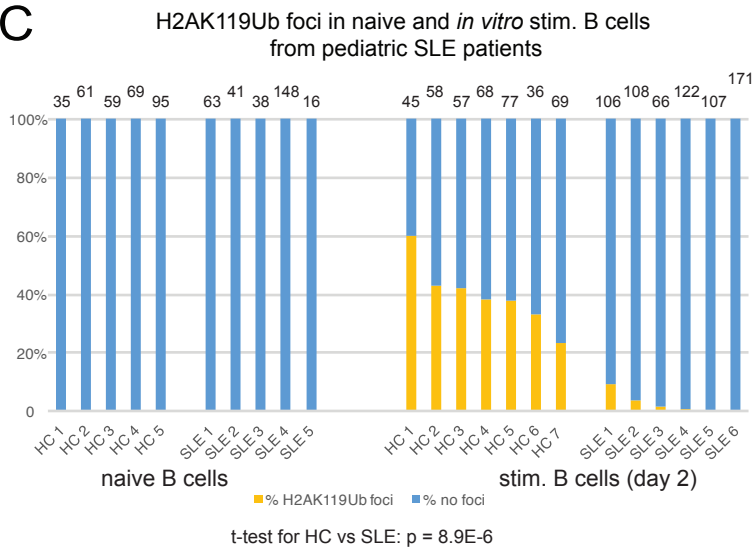

Figure 5

A

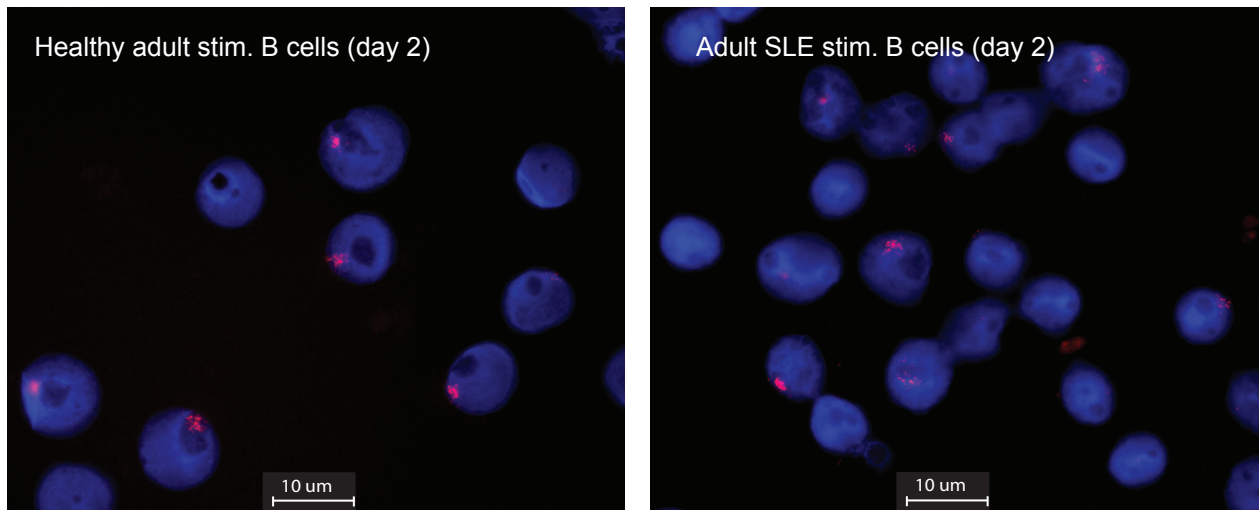

B

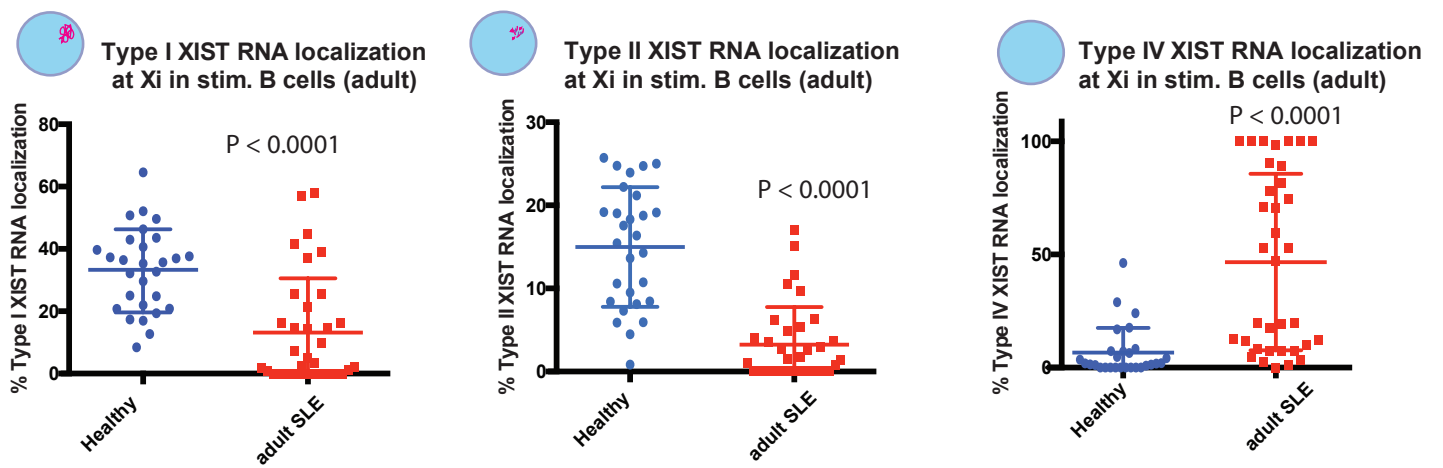

C

Co-localization of XIST RNA and H2AK119Ub foci in adult SLE patients (*in vitro* stim. B cells)

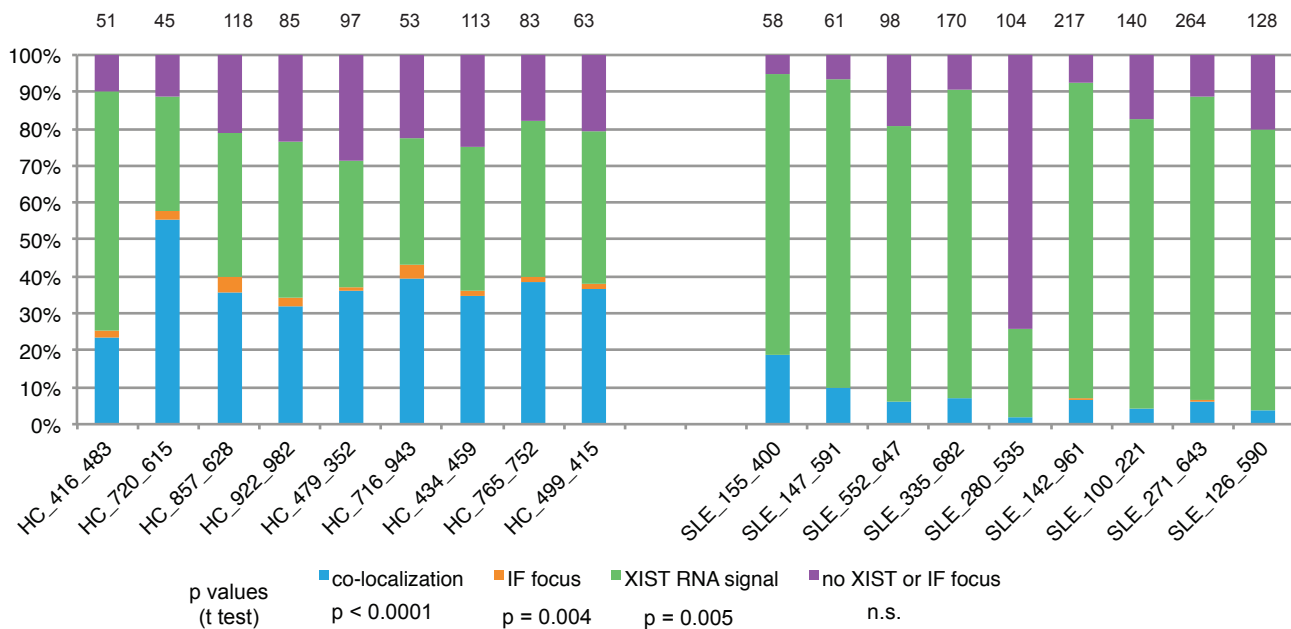

Figure 6

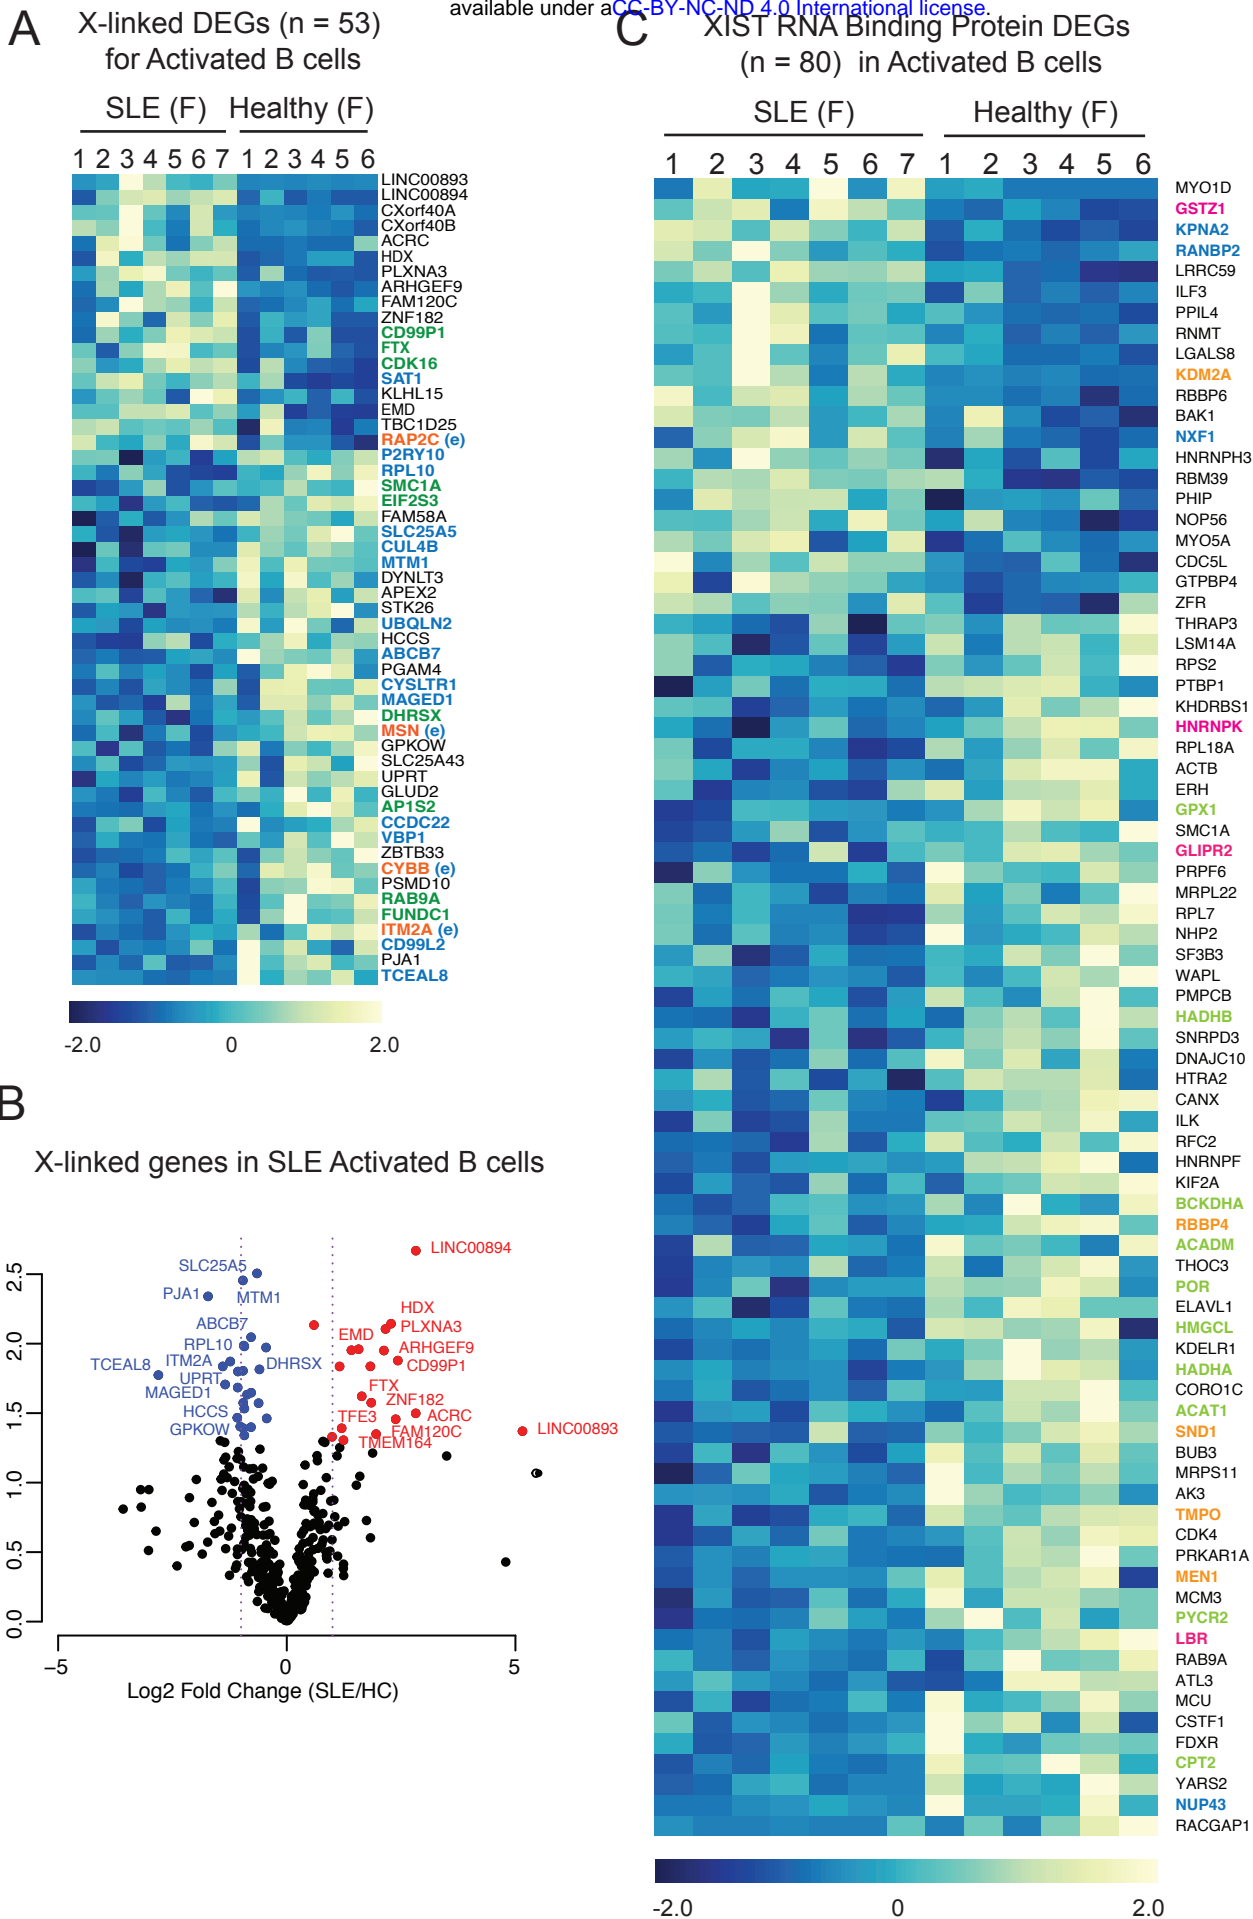

Figure 7
